# Supplementary material
Source: MDPI journal article supplement (https://www.mdpi.com/2304-6740/7/9/109)

# checkCIF/PLATON report

Structure factors have been supplied for datablock(s) compoundL3

THIS REPORT IS FOR GUIDANCE ONLY. IF USED AS PART OF A REVIEW PROCEDURE FOR PUBLICATION, IT SHOULD NOT REPLACE THE EXPERTISE OF AN EXPERIENCED CRYSTALLOGRAPHIC REFEREE.

No syntax errors found.      CIF dictionary      Interpreting this report

## Datablock: compoundL3

---

Bond precision:    C-C = 0.0064 Å                      Wavelength=0.71073

Cell:                      a=19.195(3)              b=8.5030(13)              c=30.611(5)  
                                alpha=90              beta=90              gamma=90  
Temperature:              100 K

|                | Calculated    | Reported      |
|----------------|---------------|---------------|
| Volume         | 4996.2(14)    | 4996.2(13)    |
| Space group    | P c a 21      | P c a 21      |
| Hall group     | P 2c -2ac     | P 2c -2ac     |
| Moiety formula | C33 H26 N2 O3 | C33 H26 N2 O3 |
| Sum formula    | C33 H26 N2 O3 | C33 H26 N2 O3 |
| Mr             | 498.56        | 498.56        |
| Dx,g cm-3      | 1.326         | 1.326         |
| Z              | 8             | 8             |
| Mu (mm-1)      | 0.085         | 0.085         |
| F000           | 2096.0        | 2096.0        |
| F000'          | 2096.90       |               |
| h,k,lmax       | 22,10,36      | 22,10,36      |
| Nref           | 8785[ 4485]   | 8093          |
| Tmin,Tmax      | 0.985,0.988   | 0.633,0.745   |
| Tmin'          | 0.919         |               |

Correction method= # Reported T Limits: Tmin=0.633 Tmax=0.745  
AbsCorr = MULTI-SCAN

Data completeness= 1.80/0.92                      Theta(max)= 24.987

R(reflections)= 0.0455( 6207)                      wR2(reflections)= 0.1185( 8093)

S = 1.013                      Npar= 720

---

The following ALERTS were generated. Each ALERT has the format

**test-name\_ALERT\_alert-type\_alert-level.**

Click on the hyperlinks for more details of the test.

---

## ● Alert level C

STRVA01\_ALERT\_4\_C                      Flack test results are meaningless.  
From the CIF: \_refine\_ls\_abs\_structure\_Flack      0.300  
From the CIF: \_refine\_ls\_abs\_structure\_Flack\_su      0.900

|                   |                                                  |         |        |
|-------------------|--------------------------------------------------|---------|--------|
| PLAT089_ALERT_3_C | Poor Data / Parameter Ratio (Zmax < 18) .....    | 6.20    | Note   |
| PLAT220_ALERT_2_C | Non-Solvent Resd 1 C Ueq(max)/Ueq(min) Range     | 4.5     | Ratio  |
| PLAT220_ALERT_2_C | Non-Solvent Resd 2 C Ueq(max)/Ueq(min) Range     | 4.5     | Ratio  |
| PLAT222_ALERT_3_C | Non-Solv. Resd 1 H Uiso(max)/Uiso(min) Range     | 4.6     | Ratio  |
| PLAT222_ALERT_3_C | Non-Solv. Resd 2 H Uiso(max)/Uiso(min) Range     | 4.7     | Ratio  |
| PLAT234_ALERT_4_C | Large Hirshfeld Difference C15 --C16A .          | 0.19    | Ang.   |
| PLAT234_ALERT_4_C | Large Hirshfeld Difference C16A --C17 .          | 0.19    | Ang.   |
| PLAT242_ALERT_2_C | Low 'MainMol' Ueq as Compared to Neighbors of    | C64     | Check  |
| PLAT340_ALERT_3_C | Low Bond Precision on C-C Bonds .....            | 0.00641 | Ang.   |
| PLAT911_ALERT_3_C | Missing FCF Refl Between Thmin & STh/L= 0.594    | 17      | Report |
| PLAT915_ALERT_3_C | No Flack x Check Done: Low Friedel Pair Coverage | 84      | %      |

---

## ● Alert level G

|                   |                                                  |        |        |
|-------------------|--------------------------------------------------|--------|--------|
| PLAT002_ALERT_2_G | Number of Distance or Angle Restraints on AtSite | 6      | Note   |
| PLAT007_ALERT_5_G | Number of Unrefined Donor-H Atoms .....          | 4      | Report |
| PLAT032_ALERT_4_G | Std. Uncertainty on Flack Parameter Value High . | 0.900  | Report |
| PLAT063_ALERT_4_G | Crystal Size Likely too Large for Beam Size .... | 1.00   | mm     |
| PLAT172_ALERT_4_G | The CIF-Embedded .res File Contains DFIX Records | 3      | Report |
| PLAT301_ALERT_3_G | Main Residue Disorder .....(Resd 1 )             | 8%     | Note   |
| PLAT301_ALERT_3_G | Main Residue Disorder .....(Resd 2 )             | 8%     | Note   |
| PLAT333_ALERT_2_G | Large Aver C6-Ring C-C Dist C4 -C13 .            | 1.44   | Ang.   |
| PLAT333_ALERT_2_G | Large Aver C6-Ring C-C Dist C37 -C46 .           | 1.44   | Ang.   |
| PLAT335_ALERT_2_G | Check Large C6 Ring C-C Range C46 -C54           | 0.30   | Ang.   |
| PLAT335_ALERT_2_G | Check Large C6 Ring C-C Range C50 -C49B          | 0.29   | Ang.   |
| PLAT432_ALERT_2_G | Short Inter X...Y Contact O3B ..C61              | 2.95   | Ang.   |
|                   | x,y,z =                                          | 1_555  | Check  |
| PLAT860_ALERT_3_G | Number of Least-Squares Restraints .....         | 4      | Note   |
| PLAT883_ALERT_1_G | No Info/Value for _atom_sites_solution_primary . | Please | Do !   |
| PLAT909_ALERT_3_G | Percentage of I>2sig(I) Data at Theta(Max) Still | 48%    | Note   |
| PLAT910_ALERT_3_G | Missing # of FCF Reflection(s) Below Theta(Min). | 1      | Note   |
| PLAT916_ALERT_2_G | Hooft y and Flack x Parameter Values Differ by . | 0.16   | Check  |
| PLAT933_ALERT_2_G | Number of OMIT Records in Embedded .res File ... | 4      | Note   |
| PLAT960_ALERT_3_G | Number of Intensities with I < - 2*sig(I) ...    | 11     | Check  |
| PLAT978_ALERT_2_G | Number C-C Bonds with Positive Residual Density. | 3      | Info   |
| PLAT992_ALERT_5_G | Repd & Actual _reflns_number_gt Values Differ by | 1      | Check  |

---

0 **ALERT level A** = Most likely a serious problem - resolve or explain  
0 **ALERT level B** = A potentially serious problem, consider carefully  
12 **ALERT level C** = Check. Ensure it is not caused by an omission or oversight  
21 **ALERT level G** = General information/check it is not something unexpected

1 **ALERT type 1** CIF construction/syntax error, inconsistent or missing data  
12 **ALERT type 2** Indicator that the structure model may be wrong or deficient  
12 **ALERT type 3** Indicator that the structure quality may be low  
6 **ALERT type 4** Improvement, methodology, query or suggestion  
2 **ALERT type 5** Informative message, check

---

It is advisable to attempt to resolve as many as possible of the alerts in all categories. Often the minor alerts point to easily fixed oversights, errors and omissions in your CIF or refinement strategy, so attention to these fine details can be worthwhile. In order to resolve some of the more serious problems it may be necessary to carry out additional measurements or structure refinements. However, the purpose of your study may justify the reported deviations and the more serious of these should normally be commented upon in the discussion or experimental section of a paper or in the "special\_details" fields of the CIF. checkCIF was carefully designed to identify outliers and unusual parameters, but every test has its limitations and alerts that are not important in a particular case may appear. Conversely, the absence of alerts does not guarantee there are no aspects of the results needing attention. It is up to the individual to critically assess their own results and, if necessary, seek expert advice.

### **Publication of your CIF in IUCr journals**

A basic structural check has been run on your CIF. These basic checks will be run on all CIFs submitted for publication in IUCr journals (*Acta Crystallographica*, *Journal of Applied Crystallography*, *Journal of Synchrotron Radiation*); however, if you intend to submit to *Acta Crystallographica Section C* or *E* or *IUCrData*, you should make sure that full publication checks are run on the final version of your CIF prior to submission.

### **Publication of your CIF in other journals**

Please refer to the *Notes for Authors* of the relevant journal for any special instructions relating to CIF submission.

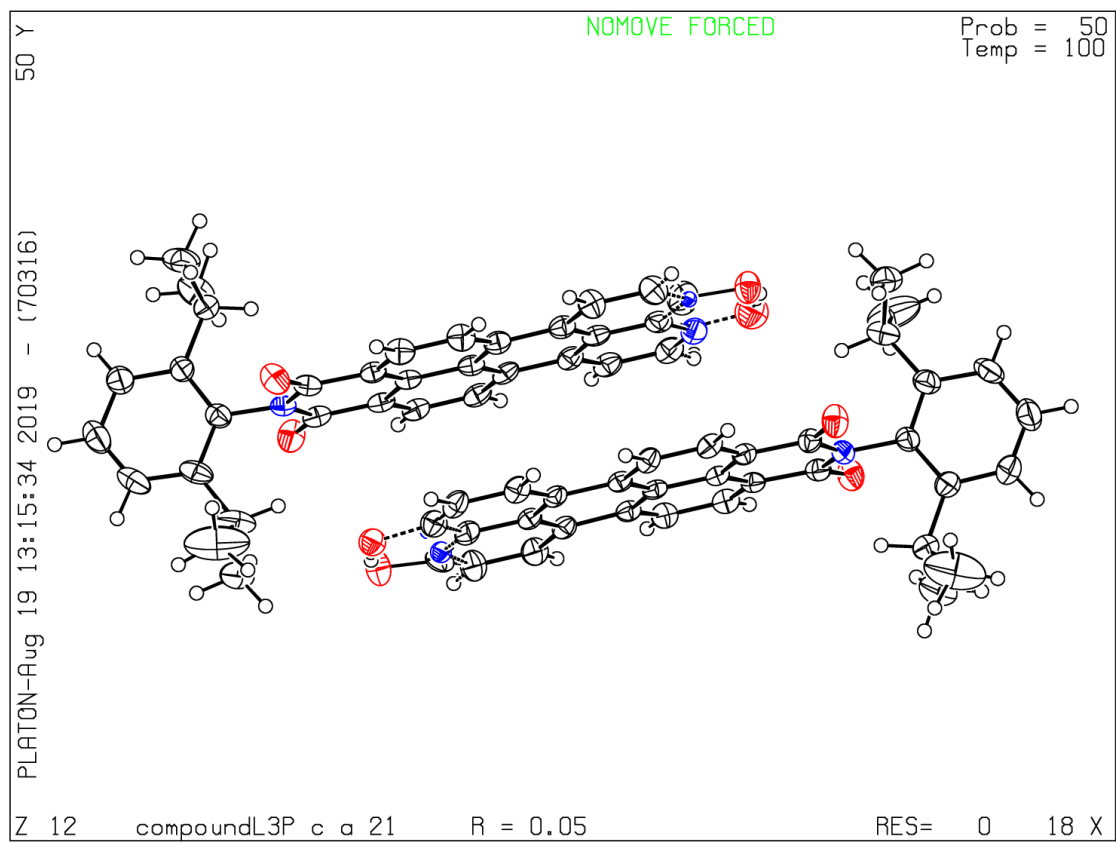

Supplement: s1 [file s1]
