# Supplementary material
Source: MDPI journal article supplement (https://www.mdpi.com/2304-6740/7/9/109)

# checkCIF/PLATON report

Structure factors have been supplied for datablock(s) compoundAIL33

THIS REPORT IS FOR GUIDANCE ONLY. IF USED AS PART OF A REVIEW PROCEDURE FOR PUBLICATION, IT SHOULD NOT REPLACE THE EXPERTISE OF AN EXPERIENCED CRYSTALLOGRAPHIC REFEREE.

No syntax errors found.      CIF dictionary      Interpreting this report

## Datablock: compoundAIL33

---

Bond precision:    C-C = 0.0060 Å                      Wavelength=0.78224

Cell:                      a=34.0652(3)              b=34.0652(3)              c=18.1656(2)  
                                alpha=90                      beta=90                      gamma=120  
Temperature:              83 K

|                        | Calculated                                          | Reported                                            |
|------------------------|-----------------------------------------------------|-----------------------------------------------------|
| Volume                 | 18255.9(4)                                          | 18255.9(4)                                          |
| Space group            | R -3                                                | R -3 :h                                             |
| Hall group             | -R 3                                                | -R 3                                                |
| Moiety formula         | 6(C57 H30 Al N3 O3), C0.90 H1.80 Cl1.80, 6(C2 H3 N) | 6(C57 H30 Al N3 O3), C0.90 H1.80 Cl1.80, 6(C2 H3 N) |
| Sum formula            | C354.90 H199.80 Al6 Cl1.80 N24 O18                  | C354.90 H199.80 Al6 Cl1.80 N24 O18                  |
| Mr                     | 5313.68                                             | 5313.67                                             |
| Dx, g cm <sup>-3</sup> | 1.450                                               | 1.450                                               |
| Z                      | 3                                                   | 3                                                   |
| Mu (mm <sup>-1</sup> ) | 0.161                                               | 0.161                                               |
| F000                   | 8249.4                                              | 8249.0                                              |
| F000'                  | 8255.94                                             |                                                     |
| h,k,lmax               | 40,40,21                                            | 40,40,21                                            |
| Nref                   | 7002                                                | 6965                                                |
| Tmin,Tmax              | 0.997,0.998                                         | 0.977,1.034                                         |
| Tmin'                  | 0.997                                               |                                                     |

Correction method= # Reported T Limits: Tmin=0.977 Tmax=1.034  
AbsCorr = MULTI-SCAN

Data completeness= 0.995                      Theta(max)= 27.499

R(reflections)= 0.0791( 5595)              wR2(reflections)= 0.2317( 6965)

S = 1.124                      Npar= 613

---

The following ALERTS were generated. Each ALERT has the format

**test-name\_ALERT\_alert-type\_alert-level.**

Click on the hyperlinks for more details of the test.

---

|                      |                                                  |              |
|----------------------|--------------------------------------------------|--------------|
| <b>Alert level C</b> |                                                  |              |
| PLAT077_ALERT_4_C    | Unitcell Contains Non-integer Number of Atoms .. | Please Check |
| PLAT202_ALERT_3_C    | Isotropic non-H Atoms in Anion/Solvent .....     | 1 Check      |
|                      | C73                                              |              |
| PLAT244_ALERT_4_C    | Low 'Solvent' Ueq as Compared to Neighbors of    | C72 Check    |
| PLAT260_ALERT_2_C    | Large Average Ueq of Residue Including N4        | 0.165 Check  |
| PLAT340_ALERT_3_C    | Low Bond Precision on C-C Bonds .....            | 0.006 Ang.   |
| PLAT906_ALERT_3_C    | Large K Value in the Analysis of Variance .....  | 8.979 Check  |
| PLAT910_ALERT_3_C    | Missing # of FCF Reflection(s) Below Theta(Min). | 6 Note       |
| PLAT911_ALERT_3_C    | Missing FCF Refl Between Thmin & Sth/L= 0.590    | 31 Report    |
| PLAT913_ALERT_3_C    | Missing # of Very Strong Reflections in FCF .... | 5 Note       |

---

|                      |                                                                                    |              |
|----------------------|------------------------------------------------------------------------------------|--------------|
| <b>Alert level G</b> |                                                                                    |              |
| ABSMU01_ALERT_1_G    | Calculation of _exptl_absorpt_correction_mu not performed for this radiation type. |              |
| PLAT002_ALERT_2_G    | Number of Distance or Angle Restraints on AtSite                                   | 3 Note       |
| PLAT068_ALERT_1_G    | Reported F000 Differs from Calcd (or Missing)...                                   | Please Check |
| PLAT072_ALERT_2_G    | SHELXL First Parameter in WGHT Unusually Large                                     | 0.11 Report  |
| PLAT083_ALERT_2_G    | SHELXL Second Parameter in WGHT Unusually Large                                    | 30.22 Why ?  |
| PLAT092_ALERT_4_G    | Check: Wavelength Given is not Cu,Ga,Mo,Ag,In Ka                                   | 0.78224 Ang. |
| PLAT172_ALERT_4_G    | The CIF-Embedded .res File Contains DFIX Records                                   | 3 Report     |
| PLAT232_ALERT_2_G    | Hirshfeld Test Diff (M-X) Al01 --O2 .                                              | 5.5 s.u.     |
| PLAT300_ALERT_4_G    | Atom Site Occupancy of Cl1 Constrained at                                          | 0.3 Check    |
| PLAT300_ALERT_4_G    | Atom Site Occupancy of C73 Constrained at                                          | 0.9 Check    |
| PLAT300_ALERT_4_G    | Atom Site Occupancy of H73 Constrained at                                          | 0.3 Check    |
| PLAT302_ALERT_4_G    | Anion/Solvent/Minor-Residue Disorder (Resd 2 )                                     | 100% Note    |
| PLAT304_ALERT_4_G    | Non-Integer Number of Atoms in ..... Resd 2                                        | 4.50 Check   |
| PLAT333_ALERT_2_G    | Large Aver C6-Ring C-C Dist C009 -C018 .                                           | 1.44 Ang.    |
| PLAT333_ALERT_2_G    | Large Aver C6-Ring C-C Dist C013 -C017 .                                           | 1.44 Ang.    |
| PLAT720_ALERT_4_G    | Number of Unusual/Non-Standard Labels .....                                        | 58 Note      |
| PLAT794_ALERT_5_G    | Tentative Bond Valency for Al01 (III) .                                            | 3.07 Info    |
| PLAT802_ALERT_4_G    | CIF Input Record(s) with more than 80 Characters                                   | 1 Info       |
| PLAT860_ALERT_3_G    | Number of Least-Squares Restraints .....                                           | 3 Note       |
| PLAT883_ALERT_1_G    | No Info/Value for _atom_sites_solution_primary .                                   | Please Do !  |
| PLAT909_ALERT_3_G    | Percentage of I>2sig(I) Data at Theta(Max) Still                                   | 60% Note     |
| PLAT933_ALERT_2_G    | Number of OMIT Records in Embedded .res File ...                                   | 19 Note      |
| PLAT960_ALERT_3_G    | Number of Intensities with I < - 2*sig(I) ...                                      | 21 Check     |
| PLAT978_ALERT_2_G    | Number C-C Bonds with Positive Residual Density.                                   | 3 Info       |
| PLAT984_ALERT_1_G    | The C-f' = -0.0020 Deviates from the B&C-Value                                     | 0.0041 Check |
| PLAT984_ALERT_1_G    | The Al-f' = 0.0674 Deviates from the B&C-Value                                     | 0.0767 Check |
| PLAT984_ALERT_1_G    | The Cl-f' = 0.1427 Deviates from the B&C-Value                                     | 0.1721 Check |
| PLAT984_ALERT_1_G    | The N-f' = -0.0031 Deviates from the B&C-Value                                     | 0.0078 Check |
| PLAT984_ALERT_1_G    | The O-f' = -0.0041 Deviates from the B&C-Value                                     | 0.0135 Check |

---

- 0 **ALERT level A** = Most likely a serious problem - resolve or explain  
0 **ALERT level B** = A potentially serious problem, consider carefully  
9 **ALERT level C** = Check. Ensure it is not caused by an omission or oversight  
29 **ALERT level G** = General information/check it is not something unexpected
- 8 ALERT type 1 CIF construction/syntax error, inconsistent or missing data  
9 ALERT type 2 Indicator that the structure model may be wrong or deficient  
9 ALERT type 3 Indicator that the structure quality may be low  
11 ALERT type 4 Improvement, methodology, query or suggestion  
1 ALERT type 5 Informative message, check

---

---

It is advisable to attempt to resolve as many as possible of the alerts in all categories. Often the minor alerts point to easily fixed oversights, errors and omissions in your CIF or refinement strategy, so attention to these fine details can be worthwhile. In order to resolve some of the more serious problems it may be necessary to carry out additional measurements or structure refinements. However, the purpose of your study may justify the reported deviations and the more serious of these should normally be commented upon in the discussion or experimental section of a paper or in the "special\_details" fields of the CIF. checkCIF was carefully designed to identify outliers and unusual parameters, but every test has its limitations and alerts that are not important in a particular case may appear. Conversely, the absence of alerts does not guarantee there are no aspects of the results needing attention. It is up to the individual to critically assess their own results and, if necessary, seek expert advice.

### **Publication of your CIF in IUCr journals**

A basic structural check has been run on your CIF. These basic checks will be run on all CIFs submitted for publication in IUCr journals (*Acta Crystallographica*, *Journal of Applied Crystallography*, *Journal of Synchrotron Radiation*); however, if you intend to submit to *Acta Crystallographica Section C* or *E* or *IUCrData*, you should make sure that full publication checks are run on the final version of your CIF prior to submission.

### **Publication of your CIF in other journals**

Please refer to the *Notes for Authors* of the relevant journal for any special instructions relating to CIF submission.

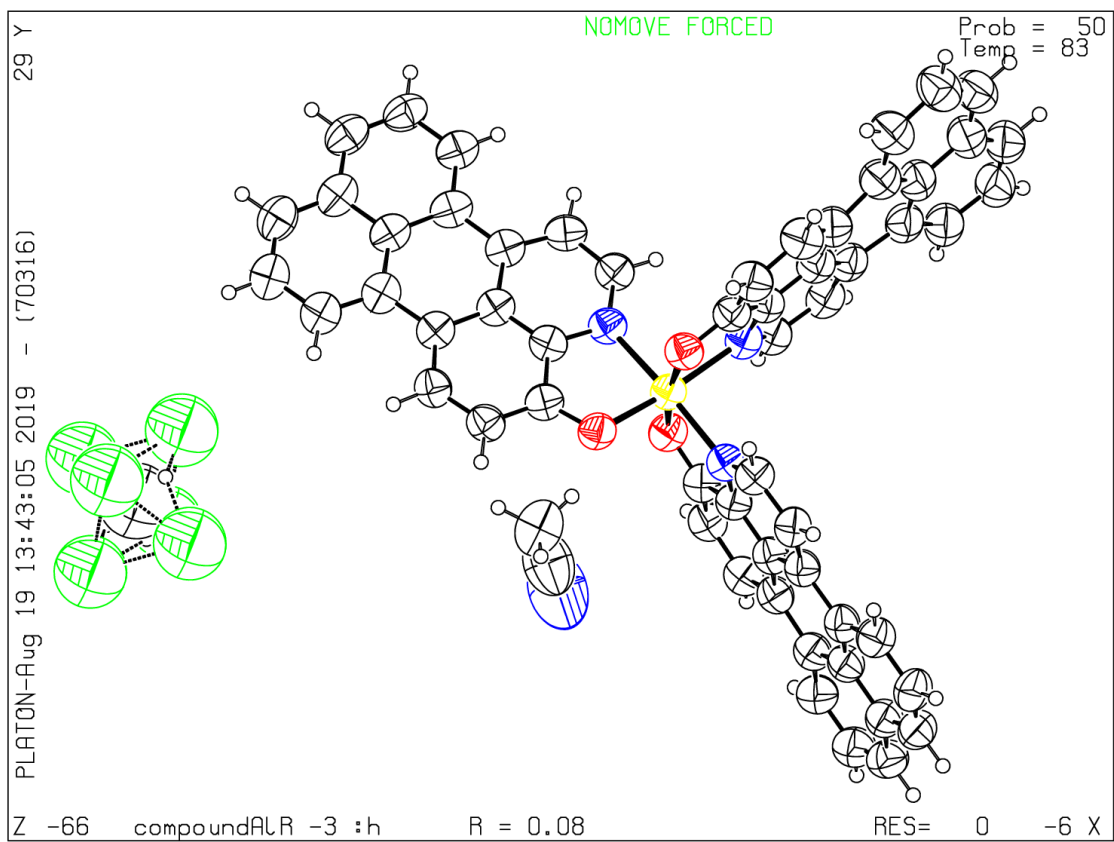

Supplement: s1 [file s1]
