# Supplementary material
Source: MDPI journal article supplement (https://www.mdpi.com/2304-6740/7/9/109)
Supplement: s1 [file s1]

# Supplementary Materials: Propeller-Shaped Aluminum Complexes with Azaperylene Core in the Ligands

Masahiro Tsukao, Yoshifumi Hashikawa, Nana Toyama, Masahiro Muraoka, Michihisa Murata, Takahiro Sasamori, Atsushi Wakamiya, and Yasujiro Murata

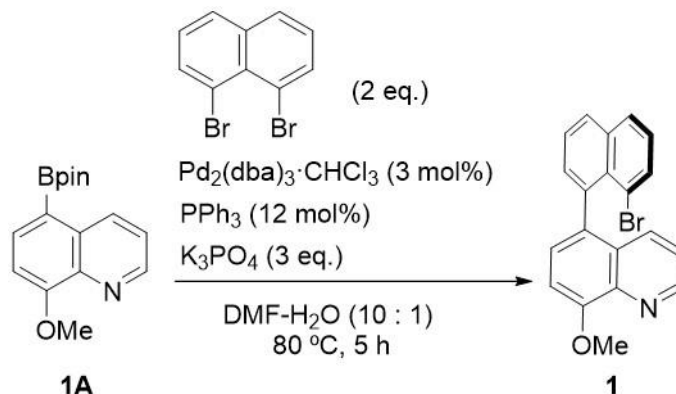

Figure S1. Synthesis of compound 1.

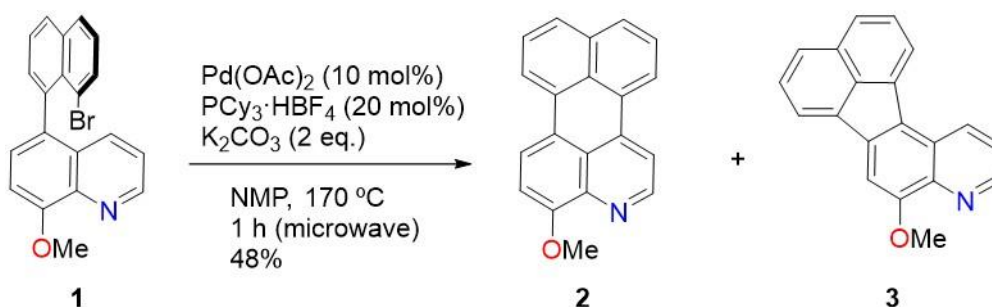

Figure S2. Synthesis of compound 2.

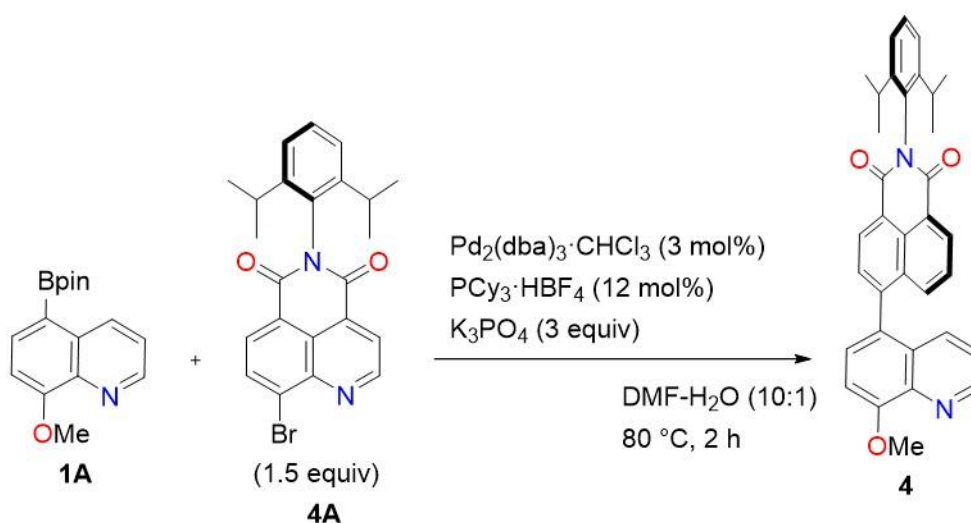

Figure S3. Synthesis of compound 4.

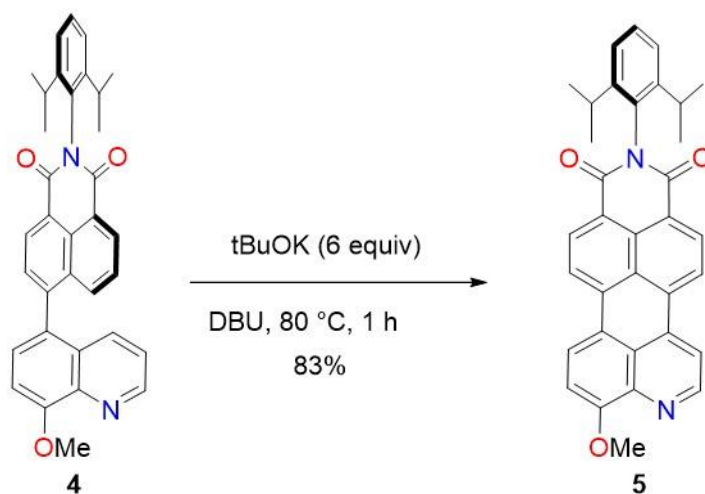

Figure S4. Synthesis of compound 5.

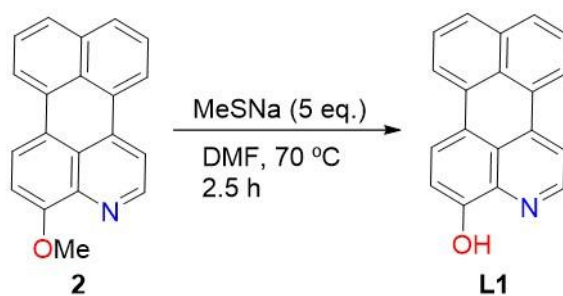

Figure S5. Synthesis of compound L1.

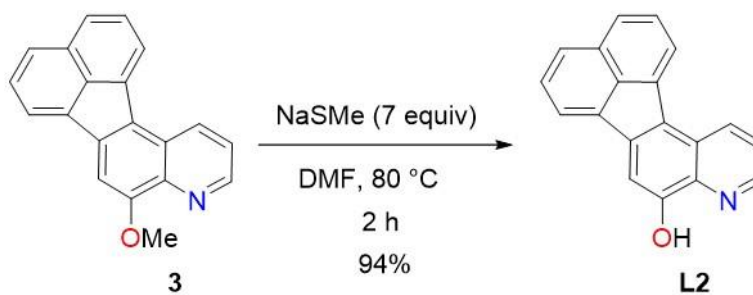

Figure S6. Synthesis of compound L2.

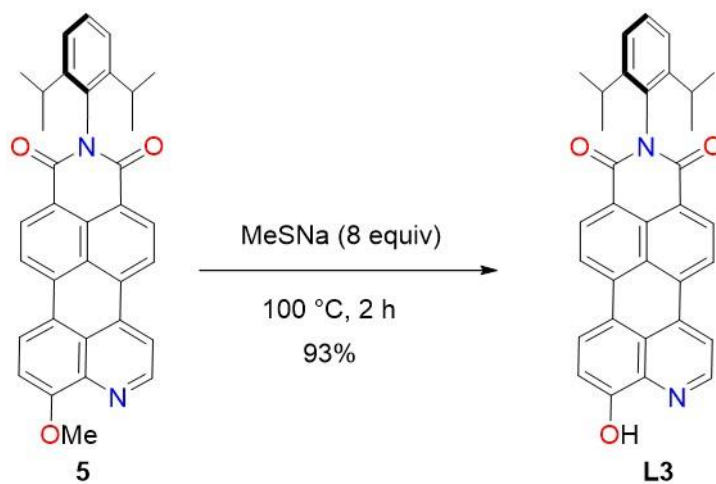

Figure S7. Synthesis of compound L3.

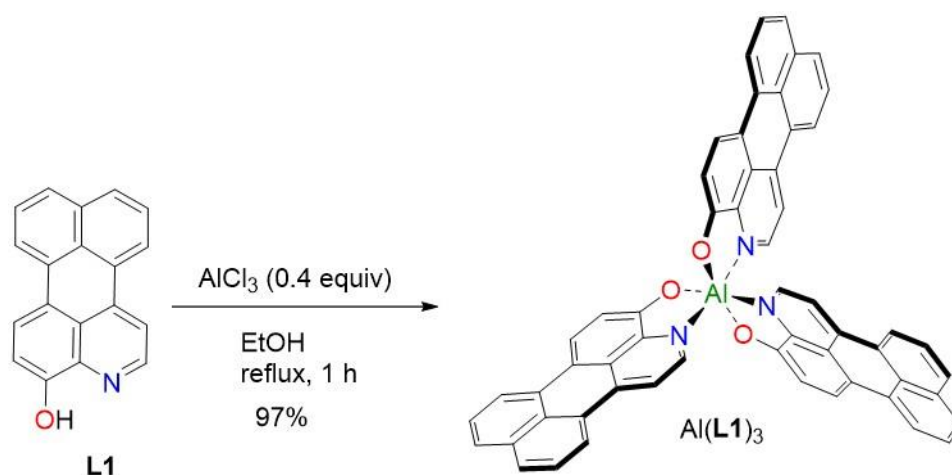Figure S8. Synthesis of compound  $\text{Al}(\text{L1})_3$ .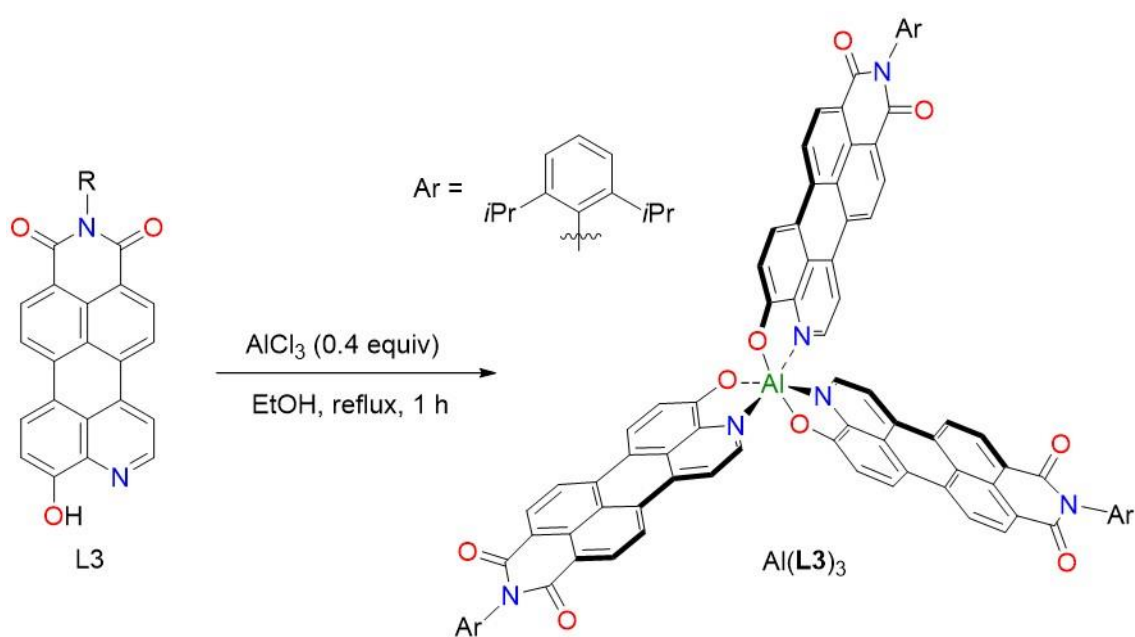Figure S9. Synthesis of compound  $\text{Al}(\text{L3})_3$ .

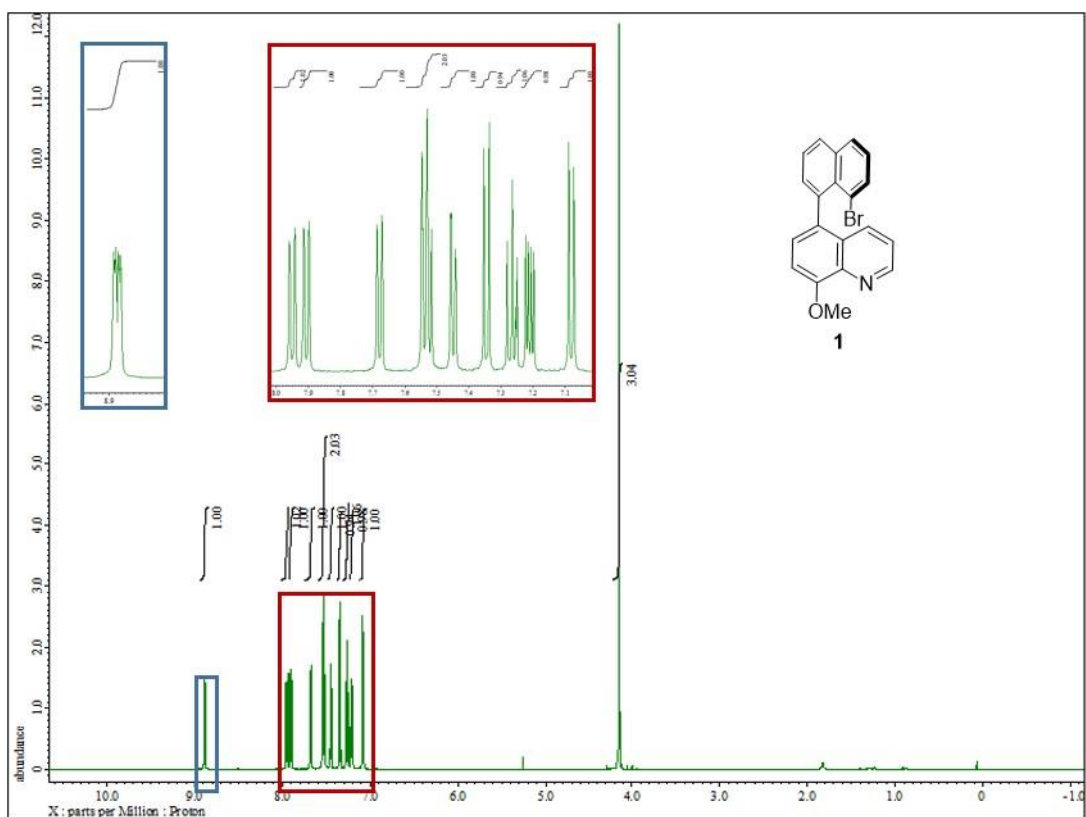Figure S10.  $^1\text{H}$  NMR of **1** (500 MHz,  $\text{CDCl}_3$ ).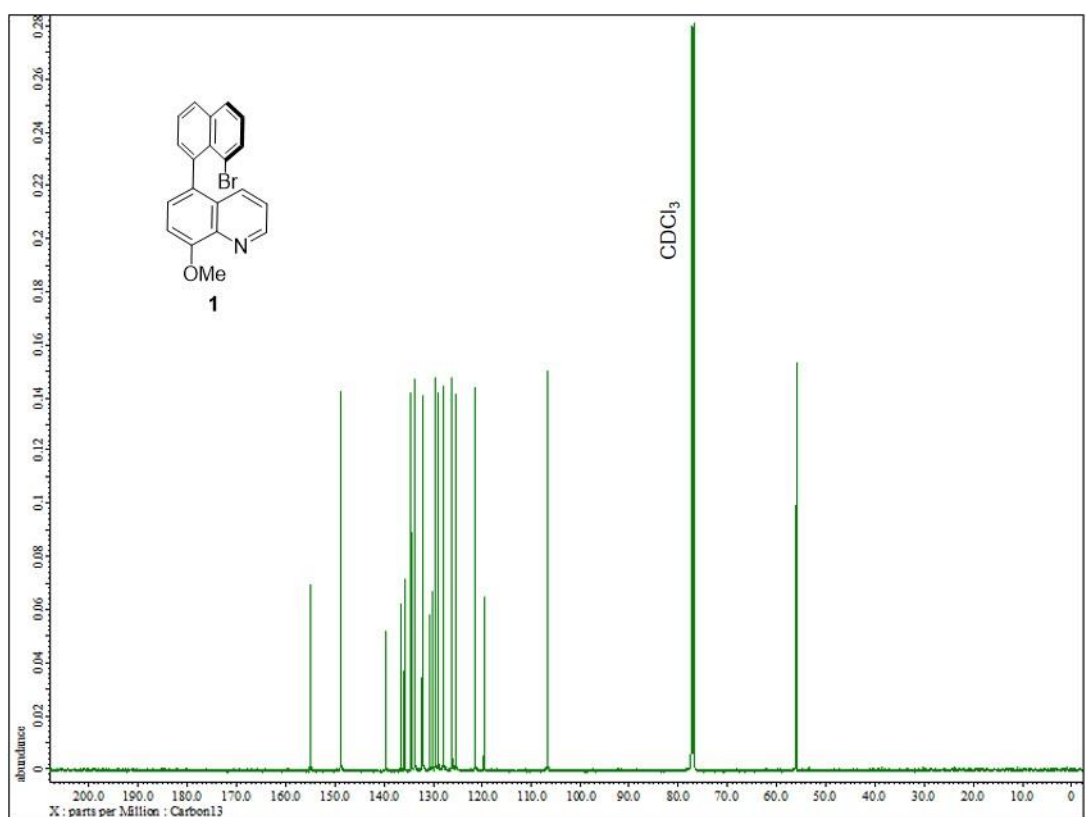Figure S11.  $^{13}\text{C}$  NMR of **1** (126 MHz,  $\text{CDCl}_3$ ).

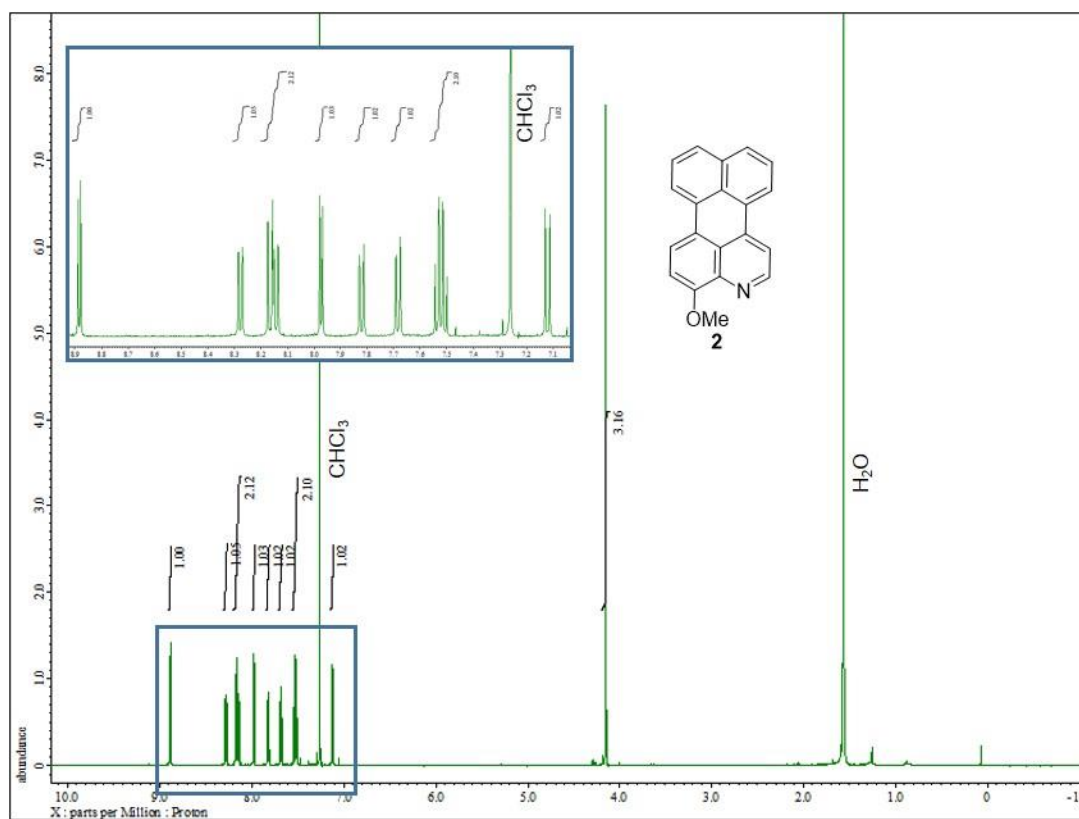Figure S12. <sup>1</sup>H NMR of **2** (500 MHz, CDCl<sub>3</sub>).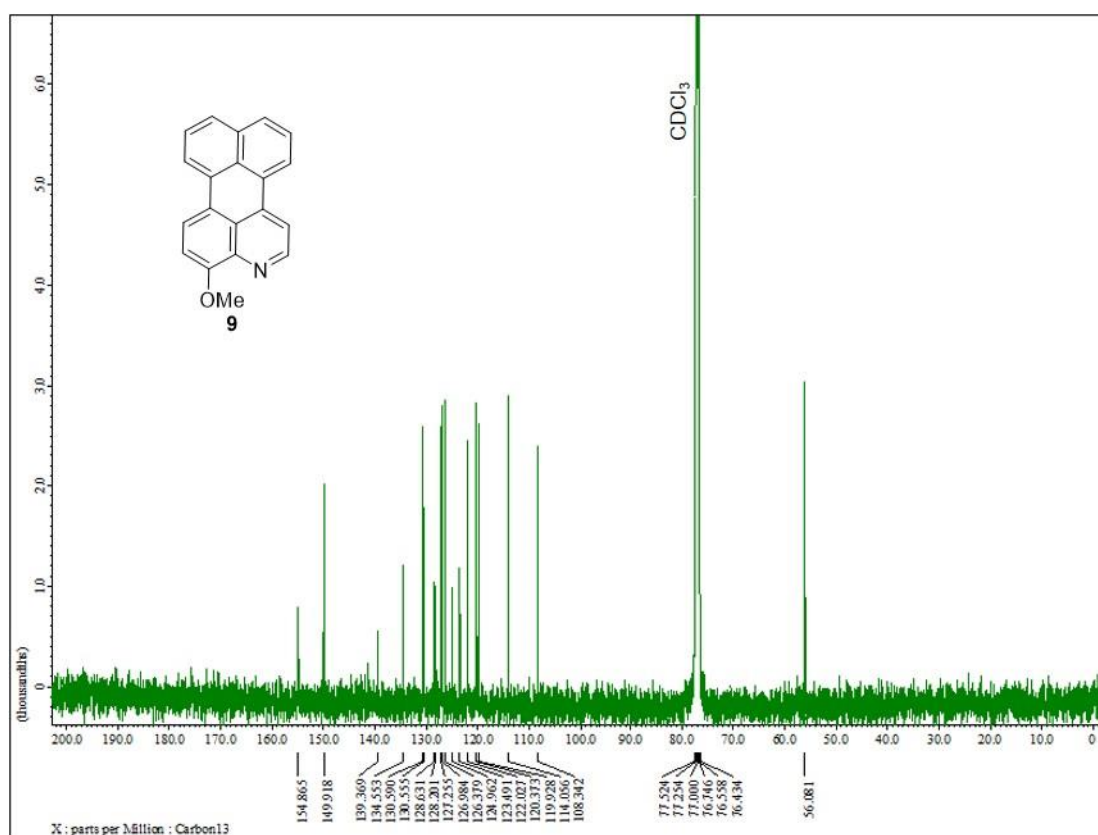Figure S13. <sup>13</sup>C NMR of **2** (126 MHz, CDCl<sub>3</sub>).

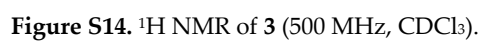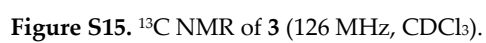

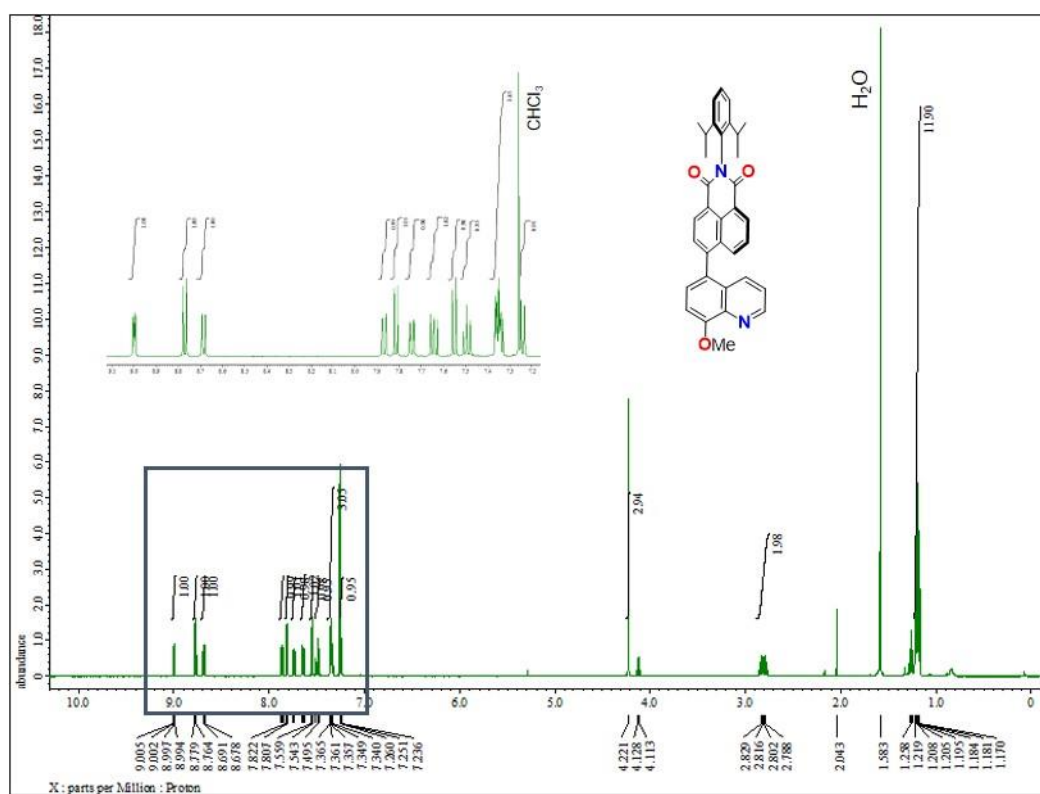Figure S16. <sup>1</sup>H NMR of 4 (500 MHz, CDCl<sub>3</sub>).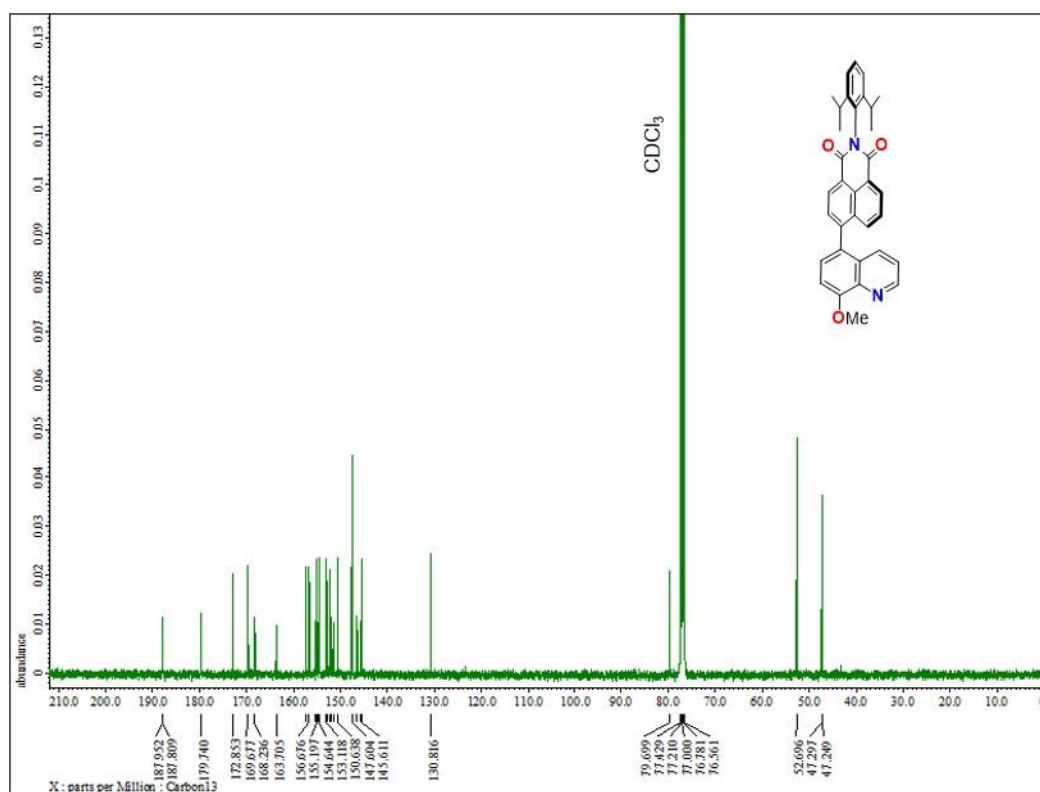Figure S17. <sup>13</sup>C NMR of 4 (126 MHz, CDCl<sub>3</sub>).



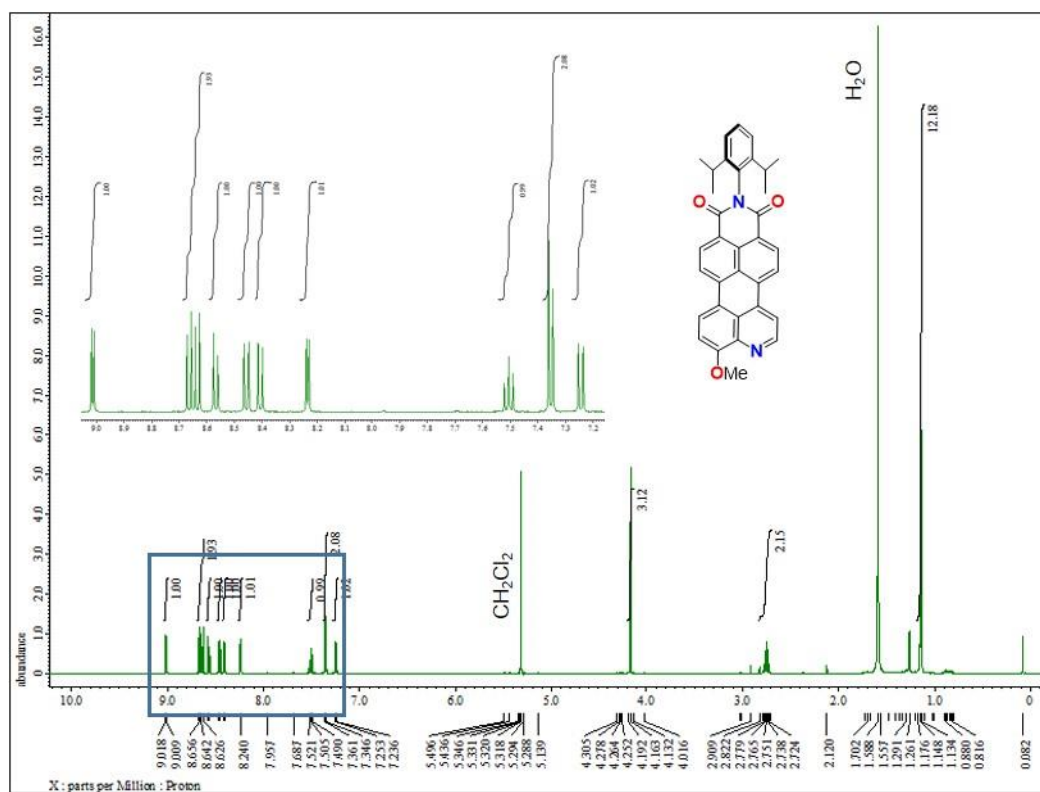Figure S18. <sup>1</sup>H NMR of 5 (500 MHz, CD<sub>2</sub>Cl<sub>2</sub>).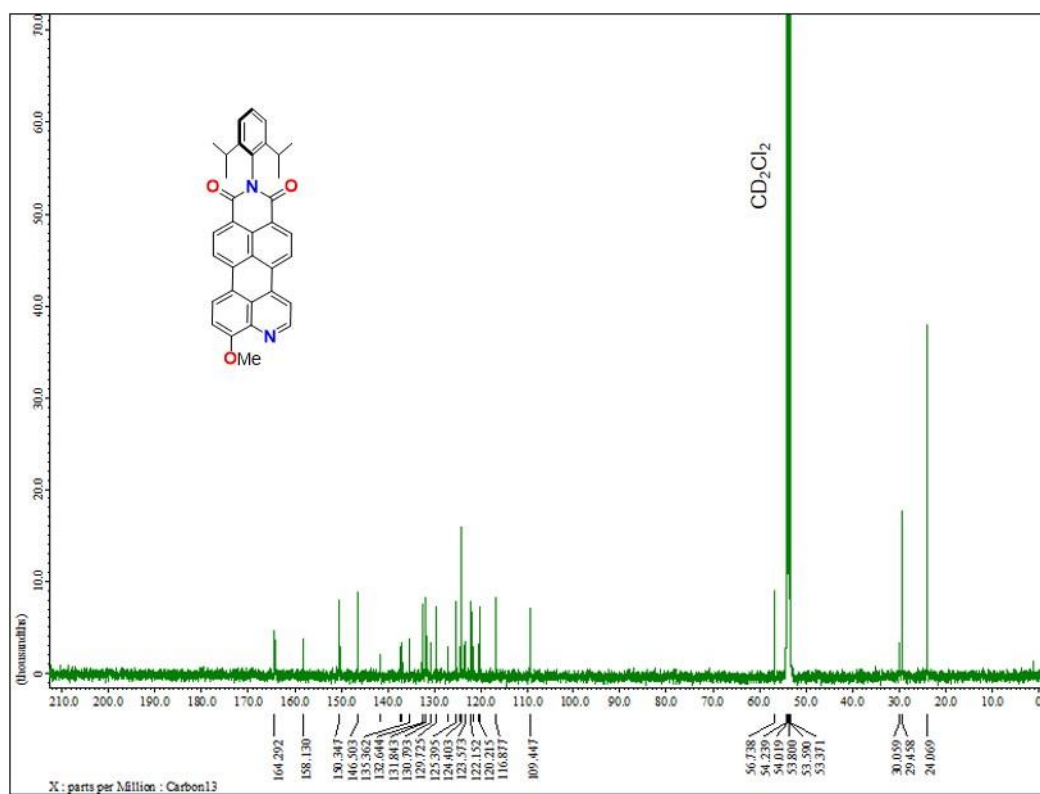Figure S19. <sup>13</sup>C NMR of 5 (126 MHz, CD<sub>2</sub>Cl<sub>2</sub>).



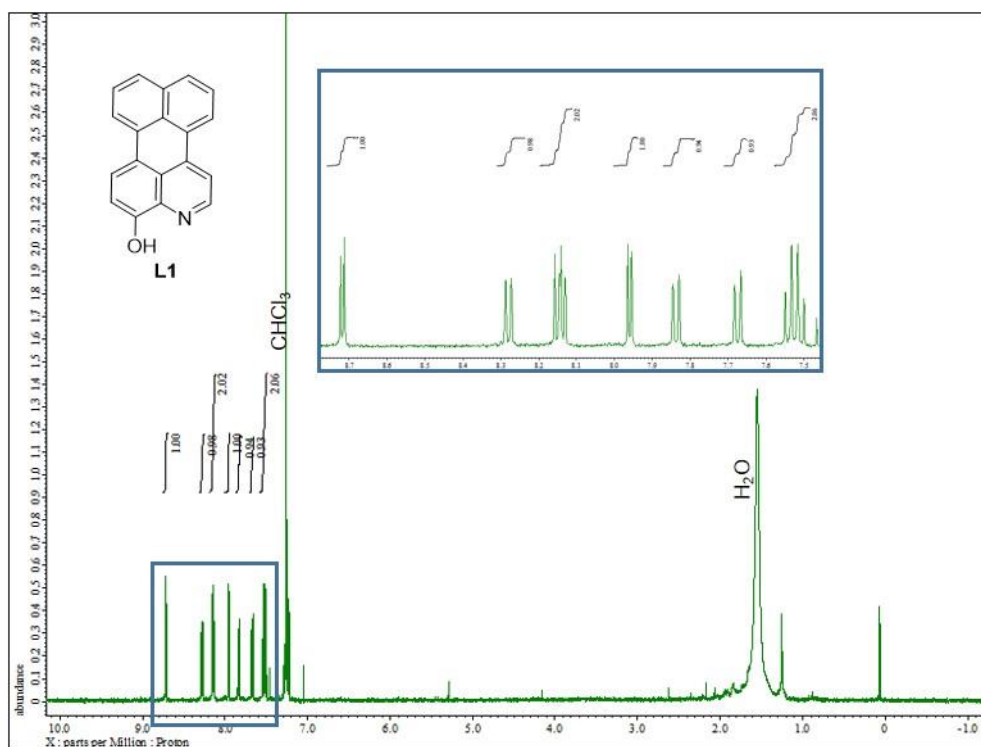

**Figure S20.**  $^1\text{H}$  NMR of L1 (500 MHz,  $\text{CDCl}_3$ ).

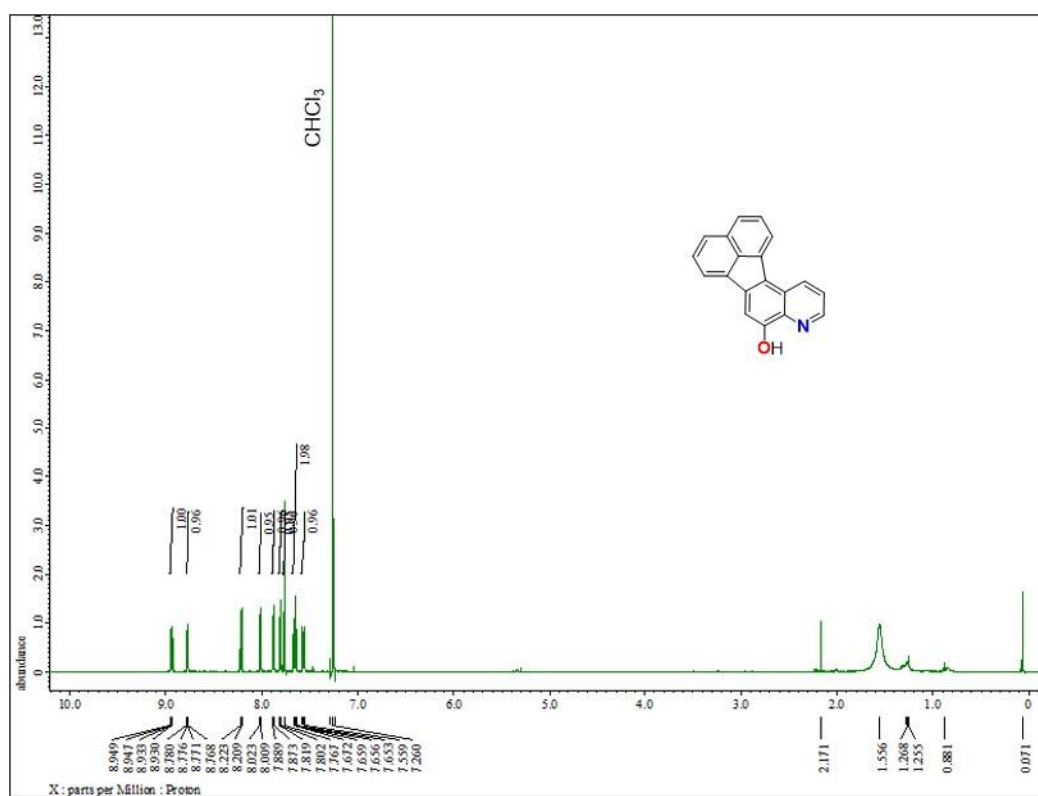

**Figure S21.** NMR of L2 (500 MHz, CDCl<sub>3</sub>).

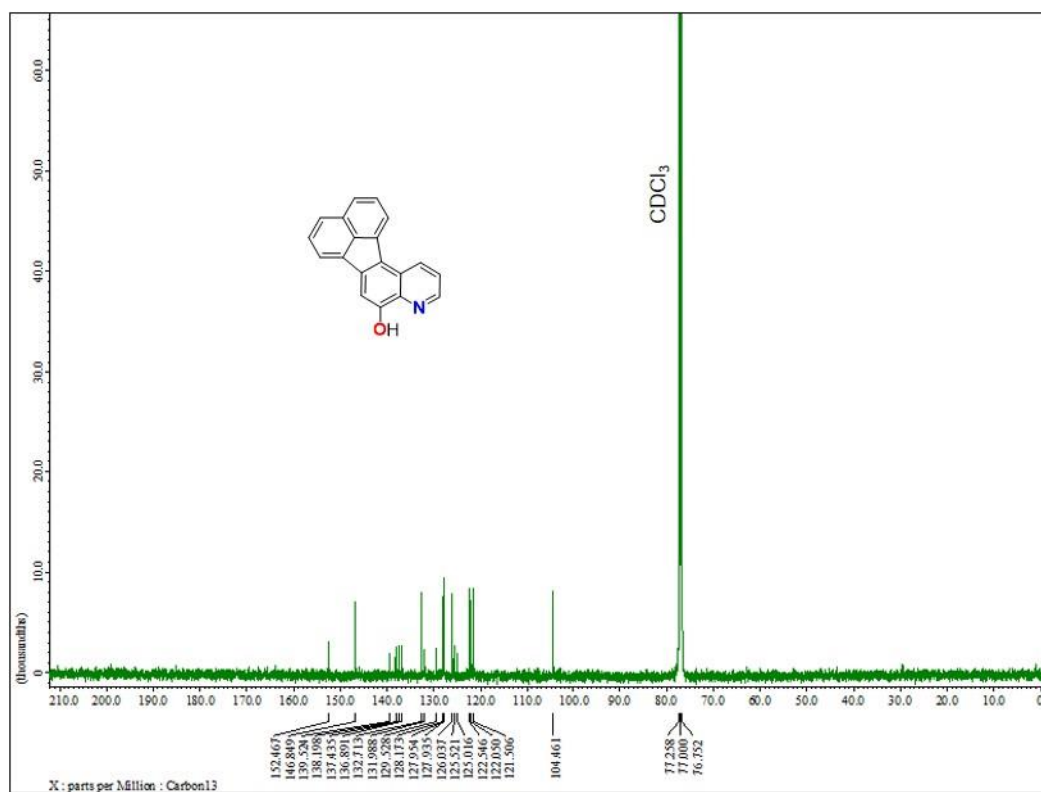Figure S22. NMR of L2 (126 MHz, CDCl<sub>3</sub>).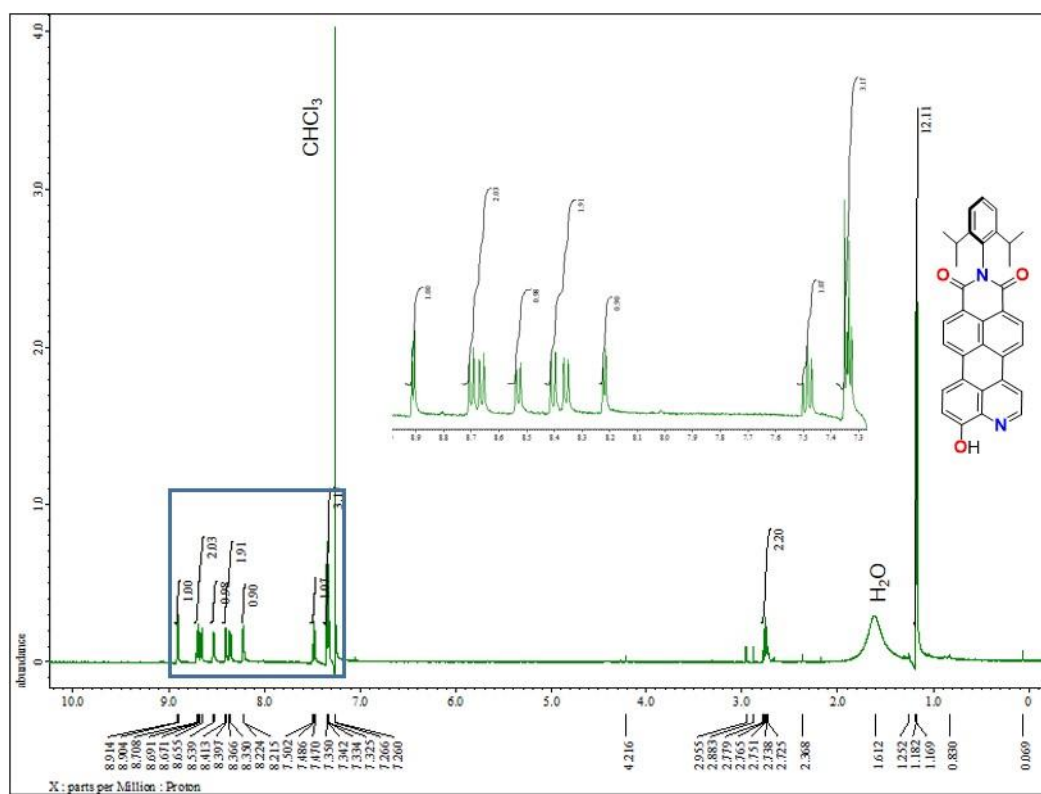Figure S23. NMR of L3 (500 MHz, CDCl<sub>3</sub>).

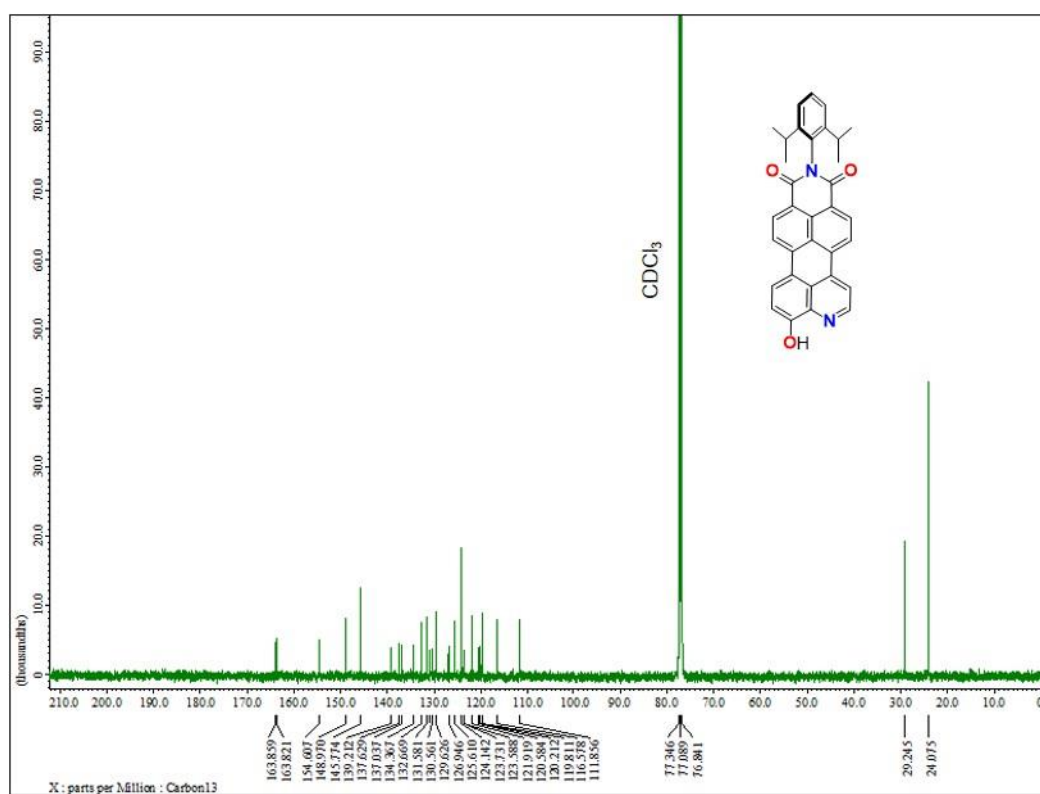

Figure S24. NMR of L3 (126 MHz, CDCl<sub>3</sub>).

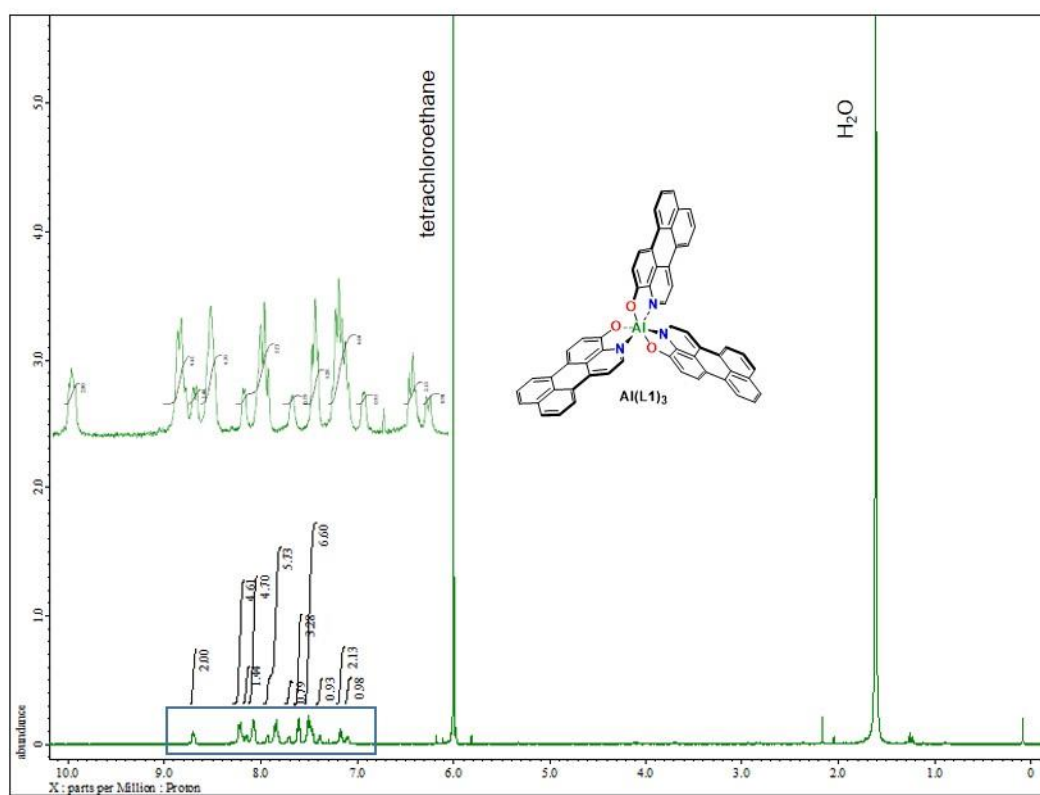

Figure S25. NMR of Al(L1)<sub>3</sub> (500 MHz, tetrachloroethane-*d*<sub>2</sub>).

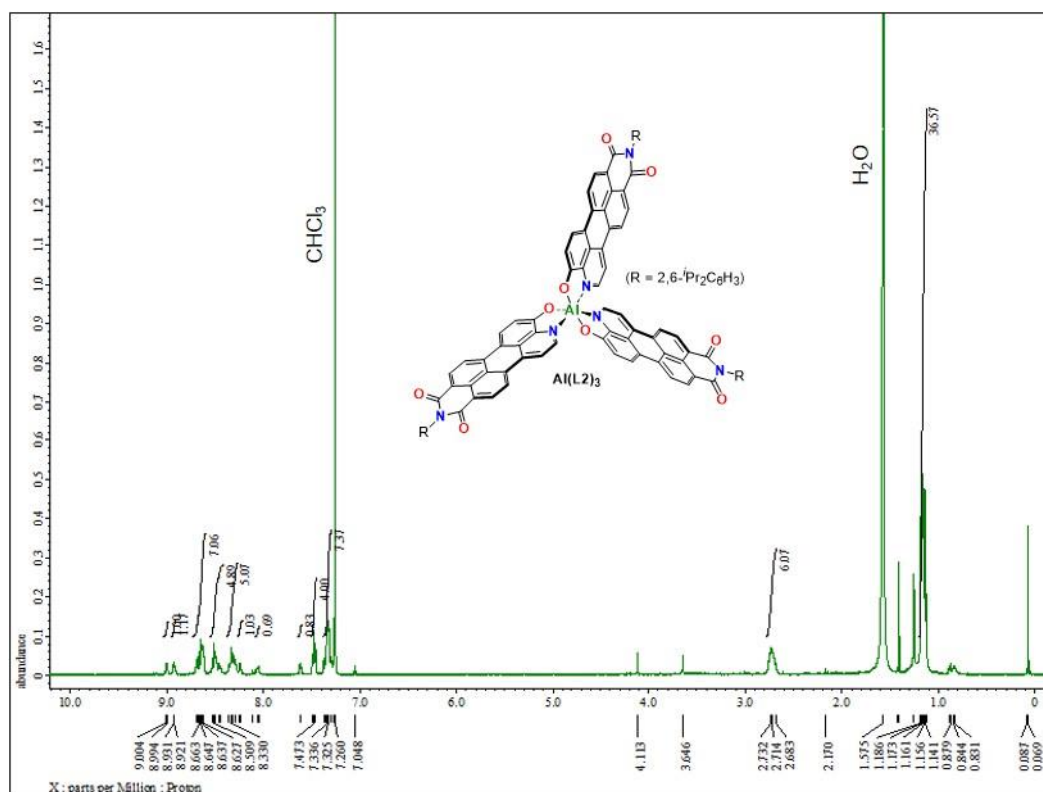

Figure S26. NMR of  $\text{Al}(\text{L}2)_3$  (500 MHz,  $\text{CDCl}_3$ ).

### X-Ray Crystallographic Analysis

Crystallographic data were deposited at the Cambridge Crystallographic Data Center as supplementary publication no. CCDC-1943910 (**2**), CCDC-1943911 ( $\text{Al}(\text{L}1)_3$ ), and CCDC-1943912 (**L3**). These data can be obtained free of charge via [www.ccdc.cam.ac.uk/data\\_request/cif](http://www.ccdc.cam.ac.uk/data_request/cif).

### X-Ray Crystal Structure Analysis of **2**

Single crystals of **2** were obtained by recrystallization from a  $\text{CH}_2\text{Cl}_2$ /hexane solution. Intensity data were collected at 100 K on a Bruker Single Crystal CCD X-ray Diffractometer (SMART APEX II) with  $\text{Mo K}\alpha$  radiation ( $\lambda = 0.71073 \text{ \AA}$ ) and graphite monochromator. A total of 5888 reflections were measured at the maximum  $2\theta$  angle of  $50.0^\circ$ , of which 2318 were independent reflections ( $R_{\text{int}} = 0.0158$ ). The structure was solved by direct methods (*SHELXT*-2014<sup>3</sup>) and refined by the full-matrix least-square on  $F^2$  (*SHELXL*-2014<sup>4</sup>). All non-hydrogen atoms were refined anisotropically. All hydrogen atoms were placed using AFIX instructions. The crystal data are as follows:  $\text{C}_{20}\text{H}_{13}\text{NO}$ ; FW = 283.31, crystal size  $0.15 \times 0.08 \times 0.07 \text{ mm}^3$ , Orthorhombic,  $Pna2_1$ ,  $a = 6.9224(7) \text{ \AA}$ ,  $b = 8.8551(9) \text{ \AA}$ ,  $c = 21.377(2) \text{ \AA}$ ,  $V = 1310.4(2) \text{ \AA}^3$ ,  $Z = 4$ ,  $D_c = 1.436 \text{ Mg/m}^3$ . The refinement converged to  $R_1 = 0.0268$ ,  $wR_2 = 0.0709$  ( $I > 2\sigma(I)$ ), GOF = 1.059.

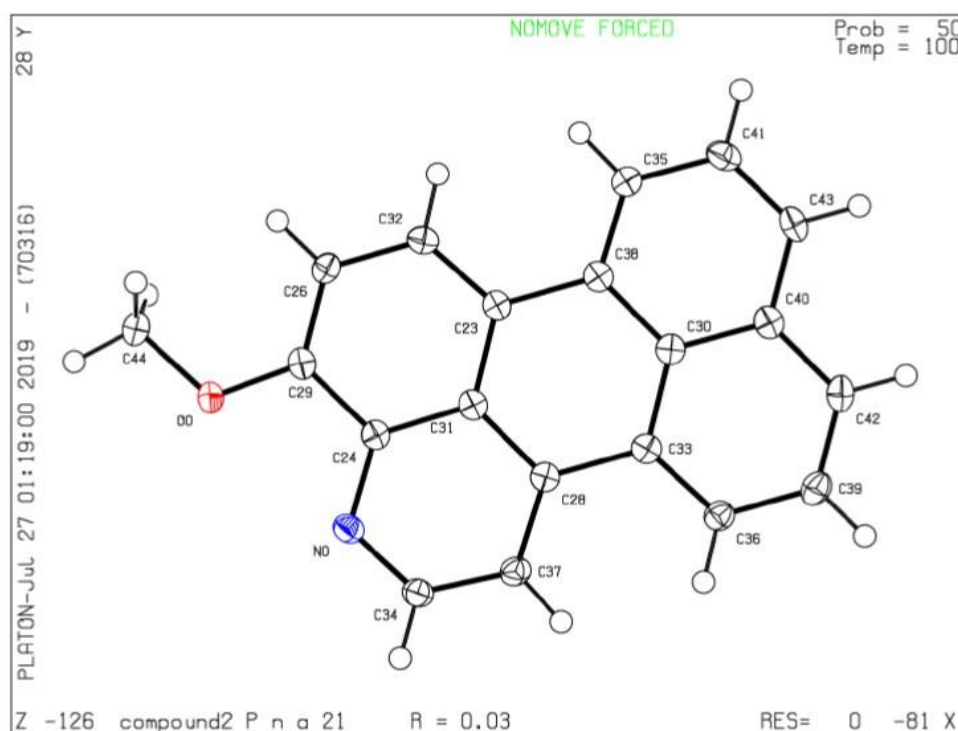

**Figure S27.** ORTEP drawing of **2** (50% probability for thermal ellipsoids).

#### *X-Ray Analysis of Compound Al(L1)<sub>3</sub>*

Single crystals of  $\text{Al}(\text{L1})_3$  were obtained by recrystallization from an ODCB/ $\text{CH}_3\text{CN}$  solution of crude products, which might be contaminated with  $\text{CH}_2\text{Cl}_2$ . Intensity data were collected at 83 K using a diffractometer equipped with an Rigaku Saturn 724 CCD system (RIGAKU, Tokyo, Japan) with synchrotron radiation at a wavelength  $0.78224 \text{ \AA}$  at the SPring-8 beamline BL40XU. A total of 68178 reflections were measured at the maximum  $2\theta$  angle of  $55.0^\circ$ , of which 6965 were independent reflections ( $R_{\text{int}} = 0.0681$ ). The structure was solved by direct methods (*SHELXT*-2014<sup>3</sup>) and refined by the full-matrix least-square on  $F^2$  (*SHELXL*-2014<sup>4</sup>). All non-hydrogen atoms were refined anisotropically and all hydrogen atoms were placed using AFIX instructions. The crystal data are as follows:  $\text{C}_{57}\text{H}_{30}\text{AlN}_3\text{O}_3 \cdot \text{CH}_3\text{CN} \cdot 0.15(\text{CH}_2\text{Cl}_2)$ ; FW = 885.61, Trigonal,  $R\text{-}3$ ,  $a = 34.0652(3) \text{ \AA}$ ,  $c = 18.1656(2) \text{ \AA}$ ,  $V = 18255.9(4) \text{ \AA}^3$ ,  $Z = 18$ ,  $D_c = 1.459 \text{ mg/m}^3$ . The refinement converged to  $R_1 = 0.0791$ ,  $wR_2 = 0.2134$  ( $I > 2\sigma(I)$ ), GOF = 1.124.

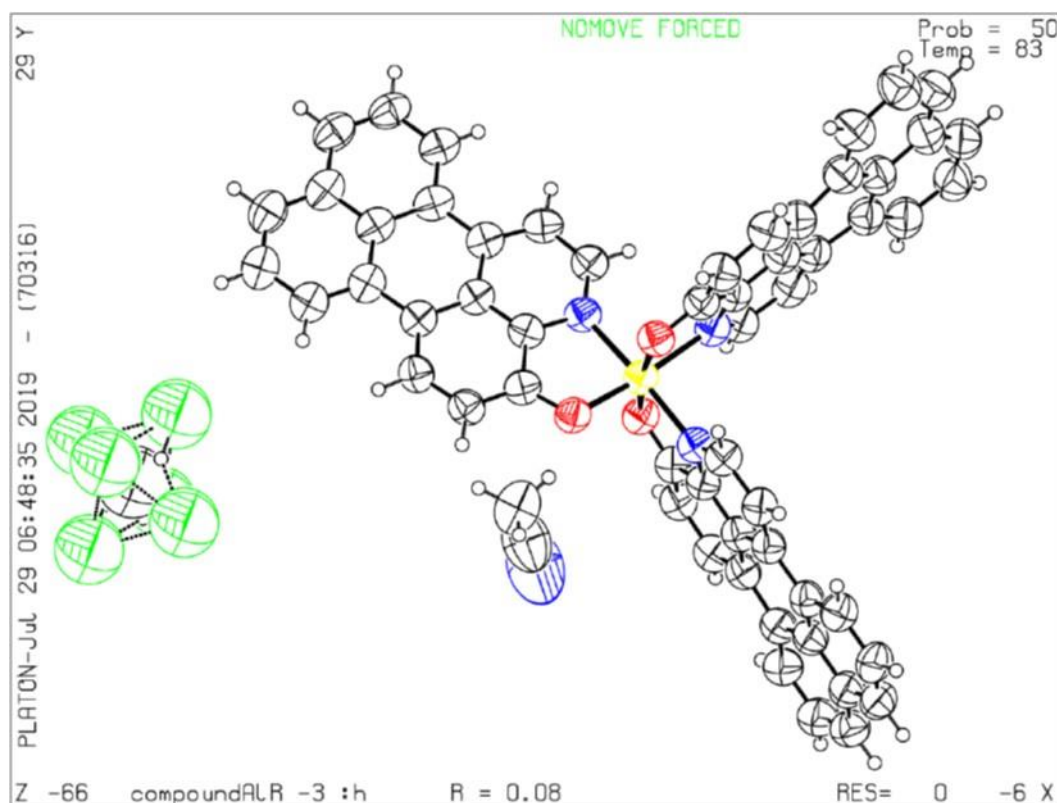

**Figure S28.** ORTEP drawing of  $\text{Al}(\text{L1})_3$  (50% probability for thermal ellipsoids).

#### X-Ray Crystal Structure Analysis of L3

Single crystals of **L3** were obtained by recrystallization from a PhCN/MeOH solution. Intensity data were collected at 100 K on a Bruker Single Crystal CCD X-ray Diffractometer (SMART APEX II) with Mo  $K\alpha$  radiation ( $\lambda = 0.71073 \text{ \AA}$ ) and graphite monochromator. A total of 22947 reflections were measured at the maximum  $2\theta$  angle of  $50.0^\circ$ , of which 8093 were independent reflections ( $R_{\text{int}} = 0.0403$ ). The structure was solved by direct methods (*SHELXT*-2014<sup>3</sup>) and refined by the full-matrix least-square on  $F^2$  (*SHELXL*-2014<sup>4</sup>). The azaperylene moiety in each **L3** molecules were disordered. The occupancies of the disordered moieties, (N2A-C17-C16A-O3A-H3A) and (N2B-C17-C16B-O3B-H3B), were refined to be 0.62 and 0.38, respectively. Similarly, another disordered moieties, (N4A, C50, C49A, O6A, H6A) and (N4B, C50, C49B, O6B, H6B), were refined to be 0.61 and 0.39, respectively. All non-hydrogen atoms except for minor parts of disordered hydroxyl groups were refined anisotropically. The C16B, C49B, N2B, and O6B were restrained using DFIX instruction. All hydrogen atoms were placed using AFIX instructions. The crystal data are as follows:  $\text{C}_{66}\text{H}_{52}\text{N}_4\text{O}_6$ ; FW = 997.11, crystal size  $1.00 \times 0.15 \times 0.14 \text{ mm}^3$ , Orthorhombic, *Pca*2<sub>1</sub>,  $a = 19.195(3) \text{ \AA}$ ,  $b = 8.5030(13) \text{ \AA}$ ,  $c = 30.611(5) \text{ \AA}$ ,  $V = 4996.2(13) \text{ \AA}^3$ ,  $Z = 4$ ,  $D_c = 1.326 \text{ Mg/m}^3$ . The refinement converged to  $R_1 = 0.0455$ ,  $wR_2 = 0.1057$  ( $I > 2\sigma(I)$ ), GOF = 1.013.

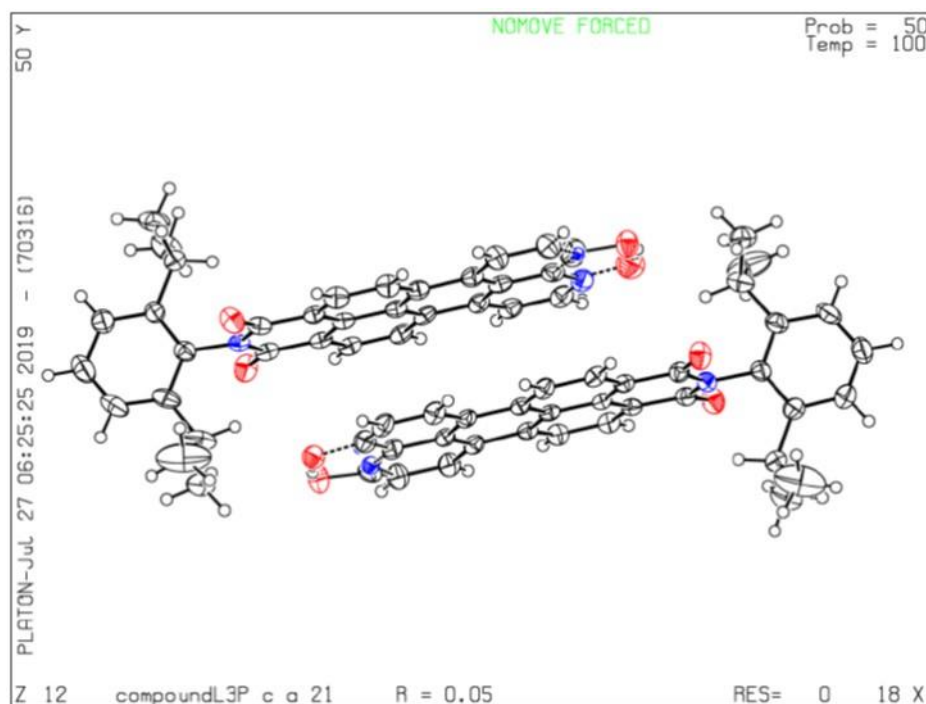

Figure S29. ORTEP drawing of L3 (50% probability for thermal ellipsoids).

### Photophysical Properties

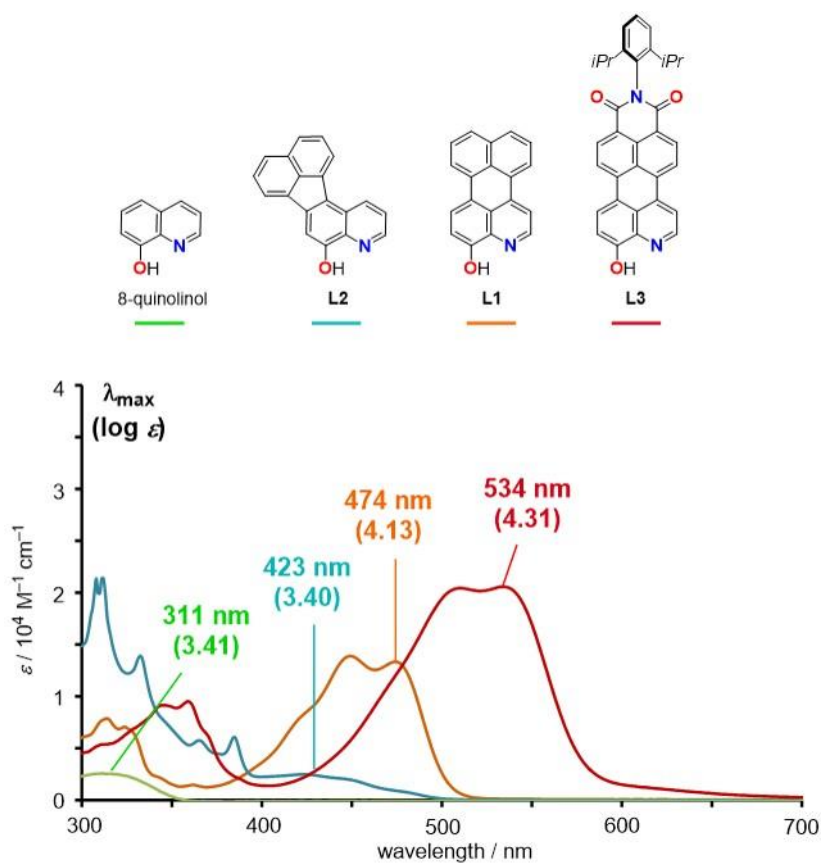

Figure S30. UV-vis absorption spectra of 8-quinolinol and L1-L3 in CH<sub>2</sub>Cl<sub>2</sub>.



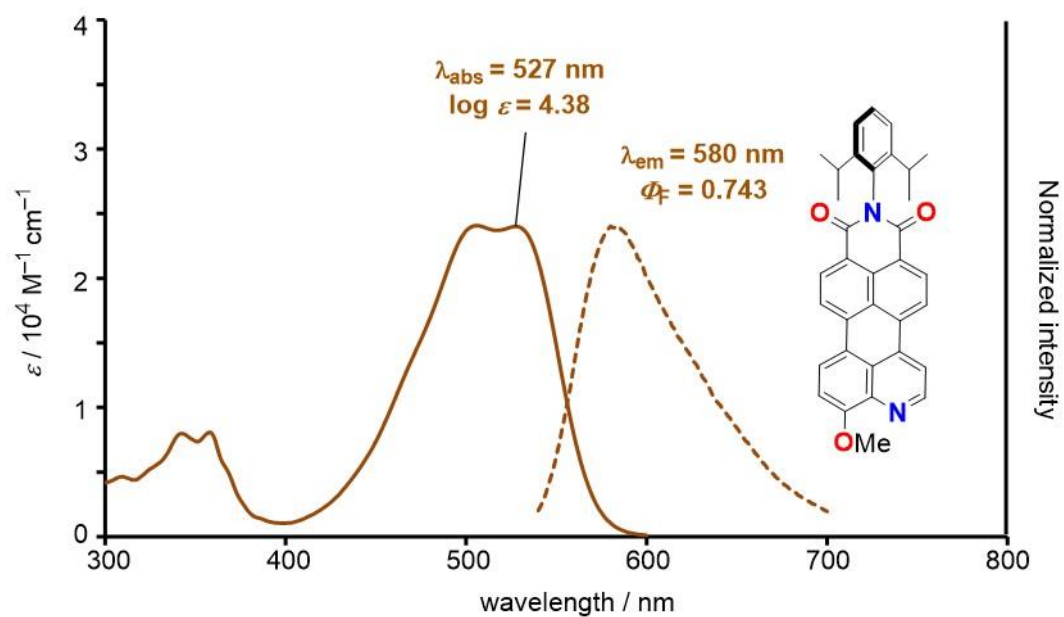

Figure S31. Photochemical properties of **2** in  $\text{CH}_2\text{Cl}_2$ .

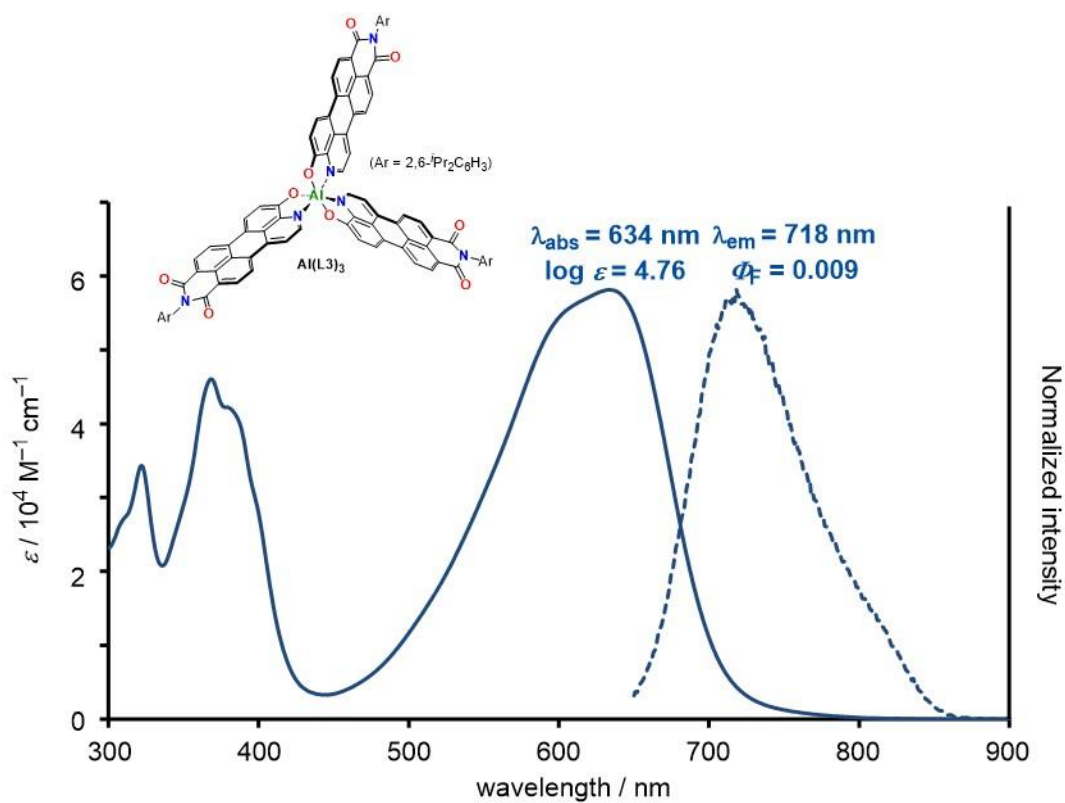

Figure S32. Photochemical properties of  $\text{Al}(\text{L}3)_3$  in  $\text{CH}_2\text{Cl}_2$ .

## Electrochemical Properties

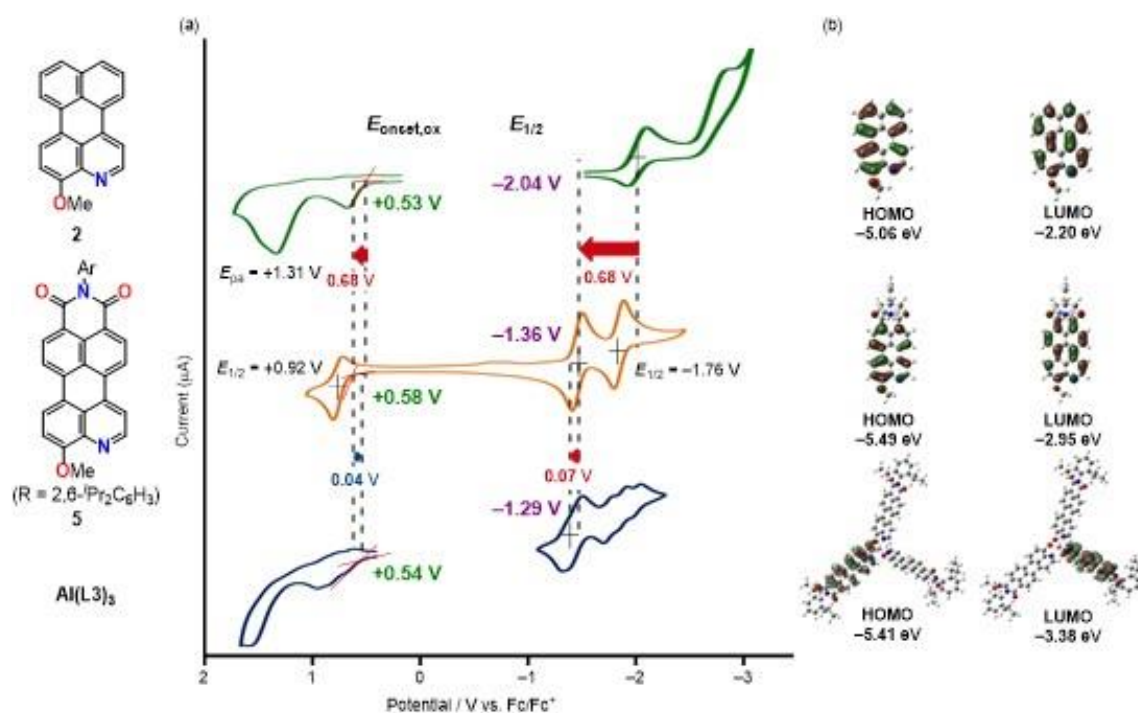

**Figure S33.** (a) Cyclic voltammograms in  $\text{CH}_2\text{Cl}_2$  with 0.1 M TBAPF<sub>6</sub> and (b) the results of DFT calculations (B3LYP/6-31G\*).

## DFT Calculations

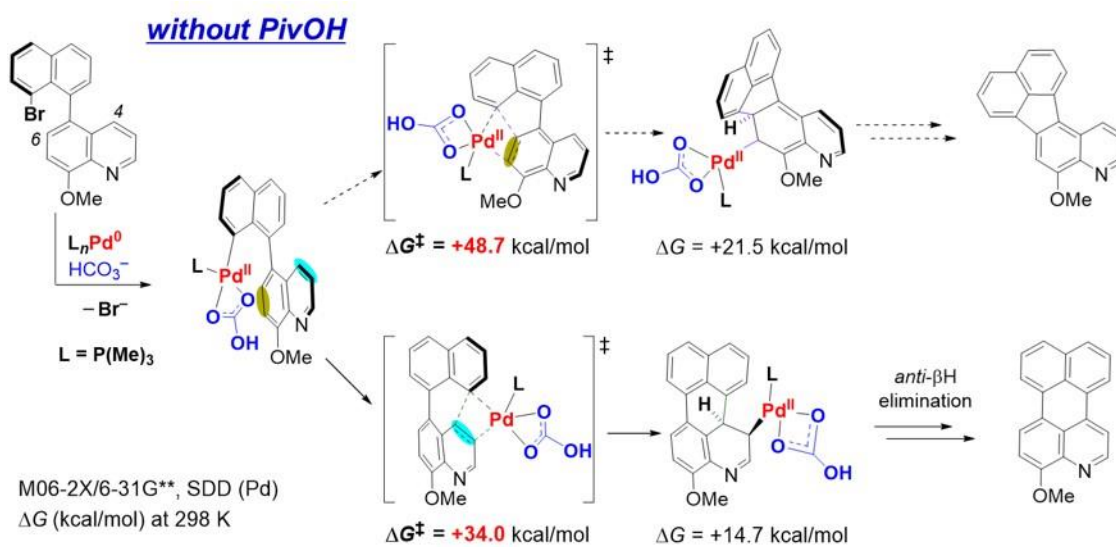

**Figure S34.** Calculated barriers for the Pd-catalyzed direct C-H arylation by Heck-type mechanism.

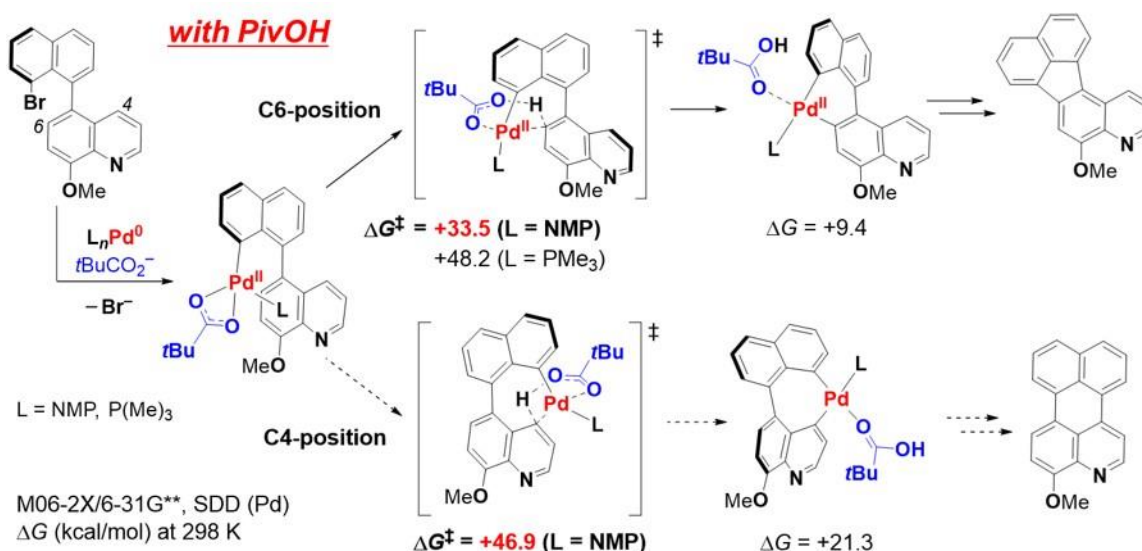

**Figure S35.** Calculated barriers for the Pd-catalyzed direct C–H arylation by CMD mechanism.

### Optimized Geometries

M06-2X/ SDD(for Pd), 6-31G\*\*(for C, N, O, P, H) level of theory

### Transition-States I

1 imaginary frequency ( $-404.1759 \text{ cm}^{-1}$ )  
 Charge = 0 Multiplicity = 1  
 C, 0,  $-4.0371653967$ ,  $-2.7897205639$ ,  $1.0406341642$   
 C, 0,  $-2.6484693866$ ,  $-2.9847571837$ ,  $0.9194571379$   
 C, 0,  $-1.8308145556$ ,  $-2.0788707553$ ,  $0.266955307$   
 C, 0,  $-2.4327527556$ ,  $-0.9220612415$ ,  $-0.3382552578$   
 C, 0,  $-3.8499652104$ ,  $-0.7651739256$ ,  $-0.2640357994$   
 C, 0,  $-4.6300498828$ ,  $-1.698642932$ ,  $0.4622784689$   
 C, 0,  $-1.6884519409$ ,  $0.0282585921$ ,  $-1.1138207582$   
 C, 0,  $-2.3580867404$ ,  $0.9680806526$ ,  $-1.8762797397$   
 C, 0,  $-3.7599288876$ ,  $1.127847111$ ,  $-1.7794876484$   
 C, 0,  $-4.4836729636$ ,  $0.2956894962$ ,  $-0.968691391$   
 C, 0,  $-0.3667262336$ ,  $-2.3017155348$ ,  $0.2307367119$   
 C, 0,  $0.2728053043$ ,  $-2.9967163924$ ,  $1.258267865$   
 C, 0,  $1.6555986421$ ,  $-3.1197800449$ ,  $1.2960005924$   
 C, 0,  $2.4546692498$ ,  $-2.5027250561$ ,  $0.3399983393$   
 C, 0,  $1.8458248074$ ,  $-1.7688258918$ ,  $-0.7067667147$   
 C, 0,  $0.4349240972$ ,  $-1.7240474087$ ,  $-0.7704519823$   
 N, 0,  $2.6736823202$ ,  $-1.1036566783$ ,  $-1.6039666071$   
 C, 0,  $2.1172072495$ ,  $-0.2879733144$ ,  $-2.436136118$   
 C, 0,  $0.69204808$ ,  $-0.0862676472$ ,  $-2.5796485151$   
 C, 0,  $-0.1936617454$ ,  $-0.9740920183$ ,  $-1.8842574566$   
 Pd, 0,  $0.1531015778$ ,  $1.0636380823$ ,  $-0.7504285733$   
 P, 0,  $-0.5546487249$ ,  $1.786963199$ ,  $1.3730405603$   
 O, 0,  $3.7873374629$ ,  $-2.6698824188$ ,  $0.4721222665$   
 C, 0,  $4.6622225077$ ,  $-1.5492670654$ ,  $0.3175278544$   
 C, 0,  $-0.4088785798$ ,  $0.4450142399$ ,  $2.6066547125$   
 C, 0,  $-2.3119841666$ ,  $2.300050176$ ,  $1.4962352249$   
 C, 0,  $0.3555591667$ ,  $3.18484175$ ,  $2.123273063$   
 C, 0,  $2.7358264676$ ,  $1.7693970574$ ,  $0.2305395775$

O, 0, 3.9807383571, 2.3062667277, 0.1319627847  
 O, 0, 1.9479916782, 2.1629114391, -0.689655664  
 O, 0, 2.4866933732, 0.9950865388, 1.1662911894  
 H, 0, -4.6350033471, -3.5245793354, 1.5697684138  
 H, 0, -2.2120041986, -3.8889830709, 1.3297571776  
 H, 0, -5.7050994845, -1.5529397416, 0.5143793879  
 H, 0, -1.8005242094, 1.6295481658, -2.5364909541  
 H, 0, -4.2520790154, 1.9097992256, -2.3488742853  
 H, 0, -5.5615186792, 0.4010980929, -0.884331534  
 H, 0, -0.3088083883, -3.4047874469, 2.0783208383  
 H, 0, 2.1512377896, -3.6513013804, 2.1004590956  
 H, 0, 2.7745793321, 0.2875941611, -3.0857010528  
 H, 0, 0.3448407632, 0.4123538415, -3.4802289419  
 H, 0, -0.9661828965, -1.4973196281, -2.4423740252  
 H, 0, 4.1484388545, -0.6257144745, 0.5955227308  
 H, 0, 5.0170408646, -1.4726712371, -0.7097857912  
 H, 0, 5.4971177533, -1.7365739256, 0.9969382872  
 H, 0, -0.6619429916, 0.8041612149, 3.608887138  
 H, 0, 0.6220491294, 0.0847029458, 2.5751635747  
 H, 0, -1.0843956763, -0.3685621107, 2.3271037695  
 H, 0, -2.5803313216, 2.5308557574, 2.5314182728  
 H, 0, -2.9515012841, 1.4937665325, 1.126058769  
 H, 0, -2.4779836446, 3.1834871662, 0.8744493288  
 H, 0, -0.0975017251, 3.4661474571, 3.0785738466  
 H, 0, 0.3474093263, 4.0393838423, 1.4437484094  
 H, 0, 1.3859049613, 2.8617949797, 2.2796512777  
 H, 0, 4.4654479169, 1.9622989796, 0.8927646724

## Transition-States II

1 imaginary frequency ( $-571.4092\text{ cm}^{-1}$ )

Charge = 0 Multiplicity = 1

C, 0, 3.4949002196, 3.4789036617, 1.1812165184  
 C, 0, 2.1408366771, 3.0821555741, 1.10130718  
 C, 0, 1.7712812498, 1.8856431078, 0.5202141547  
 C, 0, 2.7959478534, 1.0227903548, 0.0200663663  
 C, 0, 4.1637440556, 1.4122958236, 0.1149116182  
 C, 0, 4.4852608236, 2.6668725176, 0.6959808735  
 C, 0, 2.5096813212, -0.2328187494, -0.5826218865  
 C, 0, 3.5020740014, -1.0768940723, -1.0152810785  
 C, 0, 4.8564275192, -0.6652200166, -0.9358068  
 C, 0, 5.1747350214, 0.5471805812, -0.381565386  
 C, 0, 0.3495585836, 1.4319965944, 0.559350898  
 C, 0, 0.0757844828, 0.1160299391, 0.9340934059  
 C, 0, -1.2750476625, -0.2374849818, 1.2212969318  
 C, 0, -2.3104075704, 0.6512112163, 1.1520854436  
 C, 0, -2.0698297236, 1.9750799209, 0.6553881934  
 C, 0, -0.734218078, 2.364458909, 0.349272574  
 N, 0, -3.1457355753, 2.7794885157, 0.4480245257  
 C, 0, -2.9400103063, 3.9620502368, -0.0856605846  
 C, 0, -1.6698704505, 4.434125566, -0.4783039041  
 C, 0, -0.5761244821, 3.6336331537, -0.2620513901  
 Pd, 0, 0.7176806001, -0.7603823544, -1.0087377884

O, 0, -3.5828223131, 0.2399058723, 1.4517285003  
C, 0, -4.1615294041, 0.8736646733, 2.5881693658  
H, 0, 3.7423876936, 4.4305209447, 1.6413562395  
H, 0, 1.3787285169, 3.7202293466, 1.5386773035  
H, 0, 5.5283628998, 2.9664664162, 0.7492873914  
H, 0, 3.2523057633, -2.0630650907, -1.4028432832  
H, 0, 5.637282762, -1.3257620334, -1.3009512072  
H, 0, 6.2112622357, 0.8641536036, -0.3066069376  
H, 0, -1.4952653564, -1.2554200344, 1.5444884056  
H, 0, -3.8215061842, 4.5827710777, -0.237665204  
H, 0, -1.5733283161, 5.4050388547, -0.9519879082  
H, 0, 0.4113869598, 3.9531436184, -0.5781025868  
H, 0, -5.1366521566, 0.4061955506, 2.7358092328  
H, 0, -3.5385958821, 0.704387382, 3.4743580104  
H, 0, -4.2859145631, 1.9445380279, 2.413059324  
C, 0, -2.2796431209, -1.6182325197, -1.32813767  
C, 0, -2.2519203461, -2.9713154946, -0.6465795165  
C, 0, -3.5377052995, -2.9706659483, 0.1901541781  
C, 0, -4.4566264136, -1.979175333, -0.544636145  
N, 0, -3.5155590633, -1.111894371, -1.2390185263  
O, 0, -1.3337129566, -1.0578234318, -1.9015505126  
C, 0, -3.8872736475, 0.1916618623, -1.741997632  
H, 0, -1.3215582377, -3.0951185144, -0.0846560939  
H, 0, -2.2654933305, -3.7392454016, -1.4295735675  
H, 0, -3.9890151093, -3.9590086048, 0.2915977823  
H, 0, -3.3344666844, -2.5775593575, 1.1900835226  
H, 0, -5.0638612602, -1.3809448374, 0.1394439032  
H, 0, -5.1183097966, -2.4746340909, -1.2680885385  
H, 0, -4.6183578198, 0.0980610841, -2.552609461  
H, 0, -4.3076633264, 0.788793265, -0.926535475  
H, 0, -2.9842473363, 0.6754674525, -2.1183486551  
C, 0, 1.6763932811, -2.8843788543, 1.1373442177  
C, 0, 2.6384536624, -3.9465409322, 1.675476643  
O, 0, 1.4426499146, -1.9166734188, 1.9681128136  
O, 0, 1.1814444909, -2.9795403412, 0.0047101864  
C, 0, 3.949280847, -3.2504480034, 2.0678548249  
C, 0, 2.8971408974, -5.0095538508, 0.6111576996  
C, 0, 2.0011957174, -4.578642901, 2.9213674736  
H, 0, 4.6556465574, -3.9881888819, 2.4650179611  
H, 0, 3.7689440709, -2.4873832644, 2.828717805  
H, 0, 4.4122450387, -2.7642530678, 1.2017654278  
H, 0, 3.5774097838, -5.7723033866, 1.0054189164  
H, 0, 3.3513798561, -4.5673953449, -0.2808437942  
H, 0, 1.9665067841, -5.4941758518, 0.3035983949  
H, 0, 2.6822361557, -5.3221278099, 3.3500306399  
H, 0, 1.0621219495, -5.0839835101, 2.6694638053  
H, 0, 1.7932774481, -3.8160816996, 3.6763252085  
H, 0, 0.9450340781, -1.0291833482, 1.4881926723

## References for Experimental Section

1. Qin, Y.; Kiburu, I.; Shah, S.; Jäkle, S. *Org. Lett.* **2006**, *8*, 5227–5230.
2. Kim, H.N.; Puhl, L.; Nolde, F.; Li, C.; Chen, L.; Basché, T.; Müllen, K. *Chem. Eur. J.* **2013**, *19*, 9160–9166.
3. Sheldrick, G.M. *Acta Cryst.* **2015**, *A71*, 3–8.
4. Sheldrick, G.M. *Acta Crystallogr. Sect. A* **2008**, *64*, 112–122.
